# Supplementary material for: Identification of reference genes for circulating microRNA analysis in colorectal cancer
Source: PubMed Central journal article supplement (PMC5069661; doi:10.1038/srep35611), 2016-10-19

## Identification of reference genes for circulating microRNA analysis in colorectal cancer

Yanqin Niu<sup>1, 2\*</sup>, Yike Wu<sup>1\*</sup>, Jinyong Huang<sup>1</sup>, Qing Li<sup>1</sup>, Kang Kang<sup>3</sup>, Junle Qu<sup>2</sup>, Furong Li<sup>4#</sup> and Deming Gou<sup>1#</sup>

**Supplemental figure 1** Expression levels of three reference miRNAs in serum samples from Peking University Shenzhen Hospital (Shenzhen, China). hsa-miR-93-5p, hsa-miR-25-3p and hsa-miR-106b-5p were revalidated in other 30 colorectal cancer patients and 30 healthy individuals. miRNA levels were normalized to spiked-in cel-miR-54-5p and represented in scatter plots. Data are shown as means  $\pm$  SE, ns= not significant.

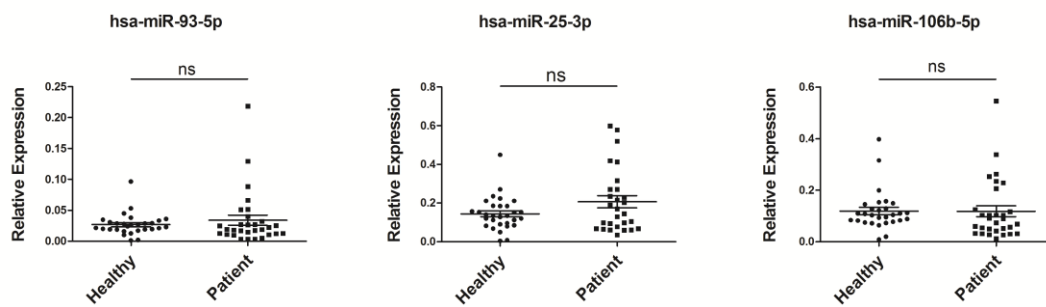

Supplement: srep35611-s1.pdf [file srep35611-s1.pdf]
