# Supplementary material for: Identification of reference genes for circulating microRNA analysis in colorectal cancer
Source: PubMed Central journal article supplement (PMC5069661; doi:10.1038/srep35611), 2016-10-19
Supplement: srep35611-s2.pdf [file srep35611-s2.pdf]

## Identification of reference genes for circulating microRNA analysis in colorectal cancer

Yanqin Niu<sup>1, 2\*</sup>, Yike Wu<sup>1\*</sup>, Jinyong Huang<sup>1</sup>, Qing Li<sup>1</sup>, Kang Kang<sup>3</sup>, Junle Qu<sup>2</sup>, Furong Li<sup>4#</sup> and Deming Gou<sup>1#</sup>

**Supplemental Figure 2** Comparison of the sensitivity of two different miRNA qPCR assays. Stem-loop method was carried out with the TaqMan microRNA assay kit (Applied Biosystems) according to the manufacturer's instructions; S-Poly(T) Plus method was performed as previous described in Niu et al., 2015<sup>1-2</sup>. hsa-miR-140-5p, hsa-miR-124a-3p, hsa-miR-16-5p, hsa-miR-93-5p, hsa-miR-25-3p and miR-106b-5p were validated using the two methods, respectively. The S-Poly(T) Plus assay showed a 2.6~263-fold increase in sensitivity (1.8-8 threshold cycles difference).

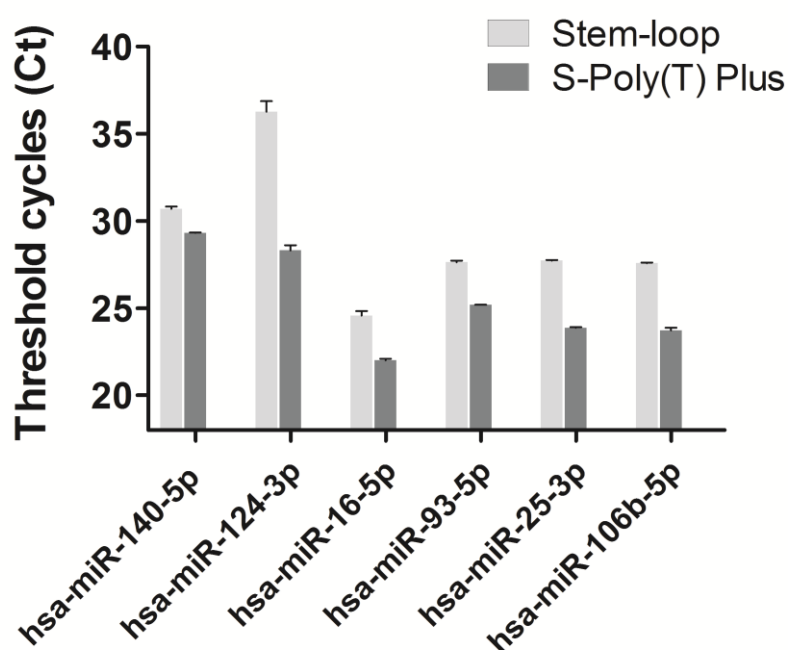

1. Niu Y, Zhang L, Qiu H, Wu Y, Wang Z, Zai Y, et al. An improved method for detecting circulating microRNAs with S-Poly (T) Plus real-time PCR. *Scientific reports*. 2015;5.
2. Kang K, Zhang X, Liu H, Wang Z, Zhong J, Huang Z, et al. A novel real-time PCR assay of microRNAs using S-Poly (T), a specific oligo (dT) reverse transcription primer with excellent sensitivity and specificity. 2012.
