# Supplementary material for: Identification of reference genes for circulating microRNA analysis in colorectal cancer
Source: PubMed Central journal article supplement (PMC5069661; doi:10.1038/srep35611), 2016-10-19

## Identification of reference genes for circulating microRNA analysis in colorectal cancer

Yanqin Niu<sup>1, 2\*</sup>, Yike Wu<sup>1\*</sup>, Jinyong Huang<sup>1</sup>, Qing Li<sup>1</sup>, Kang Kang<sup>3</sup>, Junle Qu<sup>2</sup>, Furong Li<sup>4#</sup> and Deming Gou<sup>1#</sup>

**Supplemental figure 3** Expression levels of six candidate references of colorectal cancer in non-small cell lung cancer and breast cancer. miRNAs were validated in serum of 30 healthy donors, 30 non-small cell lung cancer patients and 30 breast cancer patients. miRNA levels were normalized to spiked-in cel-miR-54-5p and represented in scatter plots. Data are shown as means  $\pm$  SE, \*\*\*  $P < 0.001$ .

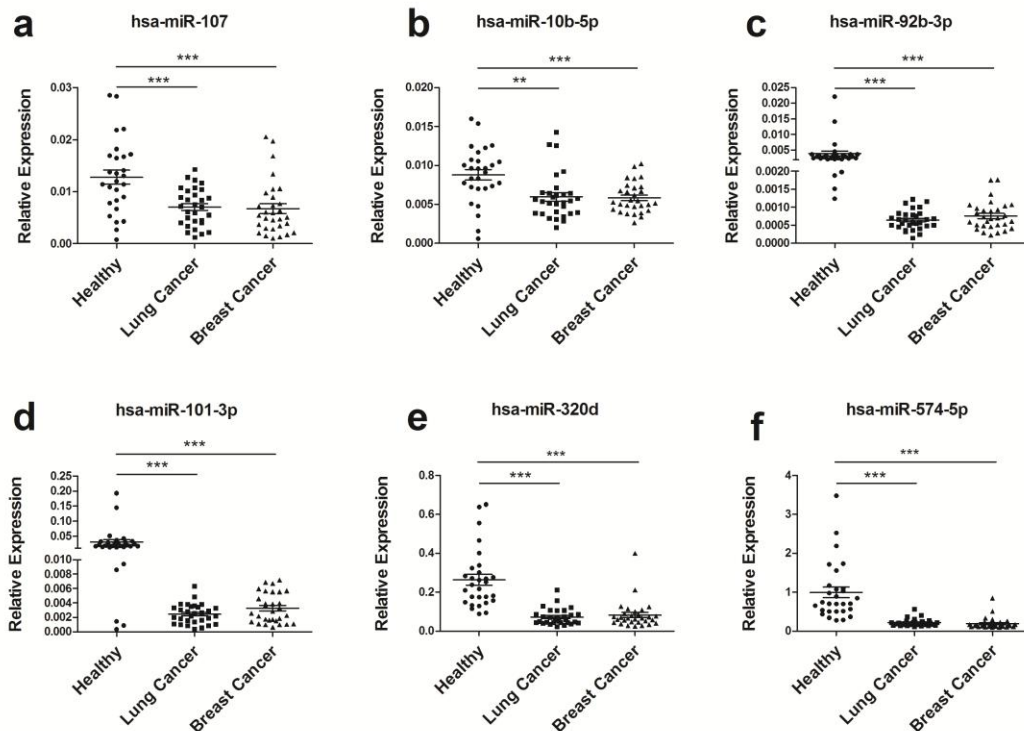

Supplement: srep35611-s3.pdf [file srep35611-s3.pdf]
