# Supplementary material for: Identification of reference genes for circulating microRNA analysis in colorectal cancer
Source: PubMed Central journal article supplement (PMC5069661; doi:10.1038/srep35611), 2016-10-19
Supplement: srep35611-s4.pdf [file srep35611-s4.pdf]

Identification of reference genes for circulating microRNA analysis in colorectal cancer

Yanqin Niu<sup>1,2\*</sup>, Yike Wu<sup>1\*</sup>, Jinyong Huang<sup>1</sup>, Qing Li<sup>1</sup>, Kang Kang<sup>3</sup>, Junle Qu<sup>2</sup>, Furong Li<sup>4#</sup> and Deming Gou<sup>1#</sup>

Supplemental table 1 Primers and probe sequences in this study.

| miRNA                         | Sequence (5'-3')         | Forward primer         | RT primer                                          | Group in RT |
|-------------------------------|--------------------------|------------------------|----------------------------------------------------|-------------|
| >hsa-miR-92b-3p MIMAT0003218  | UAUUGCACUCGUCCCGCCUCC    | TGGTATTGCACTCGTCCCG    | GTGCAGGGTCCGAGGTCAGAGCCACCTGGGCAATTTTTTTTTTTGGAGGC | 1           |
| >hsa-miR-490-3p MIMAT0002806  | CAACCUUGGAGGACUCCAUGCUG  | GGCAACCTGGAGGACTCC     | GTGCAGGGTCCGAGGTCAGAGCCACCTGGGCAATTTTTTTTTTTCAGCAT | 1           |
| >hsa-miR-107 MIMAT0000104     | AGCAGCAUUGUACAGGGCUAUCA  | GGAGCAGCATTGTACAGGG    | GTGCAGGGTCCGAGGTCAGAGCCACCTGGGCAATTTTTTTTTTTGATAGC | 1           |
| >hsa-miR-30e-5p MIMAT0000692  | UGUAAAACAUCCUUGACUGGAAG  | TTCGGTGTAAACATCCTTGAC  | GTGCAGGGTCCGAGGTCAGAGCCACCTGGGCAATTTTTTTTTTCTTCCA  | 1           |
| >hsa-miR-485-5p MIMAT0002175  | AGAGGCUGGCCGUGAUGAAUUC   | GGAGAGGCTGGCCGTGAT     | GTGCAGGGTCCGAGGTCAGAGCCACCTGGGCAATTTTTTTTTTTGAATTC | 1           |
| >hsa-miR-1237-3p MIMAT0005592 | UCCUUCUGCUCCGUCCCCAG     | CGGTCTTCTGTCTCCGTC     | GTGCAGGGTCCGAGGTCAGAGCCACCTGGGCAATTTTTTTTTTCTGGGG  | 1           |
| >hsa-miR-372-3p MIMAT0000724  | AAAGUGCUGCGACAUUUGAGCGU  | CGGAAAGTGTCTGACATTT    | GTGCAGGGTCCGAGGTCAGAGCCACCTGGGCAATTTTTTTTTTACGCTC  | 1           |
| >hsa-miR-744-5p MIMAT0004945  | UGC GGGGUAGGGCUAACAGCA   | TGTGCGGGGCTAGGGCTA     | GTGCAGGGTCCGAGGTCAGAGCCACCTGGGCAATTTTTTTTTTGTGT    | 2           |
| >hsa-miR-3662 MIMAT0018083    | GAAAUGAUGAGUAGUGACUGAUG  | CGGAAAATGATGAGTAGTGA   | GTGCAGGGTCCGAGGTCAGAGCCACCTGGGCAATTTTTTTTTTTCATCAG | 2           |
| >hsa-miR-206 MIMAT0000462     | UGGAAUGUAAGGAAGUGUGUG    | TTCGGTGGAAATGTAAGGAAGT | GTGCAGGGTCCGAGGTCAGAGCCACCTGGGCAATTTTTTTTTTCCACAC  | 2           |
| >hsa-miR-125a-3p MIMAT0004602 | ACAGGUGAGGUUCUUGGGAGCC   | CGGACAGGTGAGGTCTTG     | GTGCAGGGTCCGAGGTCAGAGCCACCTGGGCAATTTTTTTTTTGGCTCC  | 2           |
| >hsa-miR-637 MIMAT0003307     | ACUGGGGGCUUUCGGGCUCUGCGU | ACTGGGGGCTTTCGGGCT     | GTGCAGGGTCCGAGGTCAGAGCCACCTGGGCAATTTTTTTTTTACGCGAG | 2           |
| >hsa-miR-34c-3p MIMAT0004677  | AAUCACUAACCACACGGCCAGG   | TCGGAATCACTAACCACACG   | GTGCAGGGTCCGAGGTCAGAGCCACCTGGGCAATTTTTTTTTTCTTGGC  | 2           |
| >hsa-miR-877-3p MIMAT0004950  | UCCUCUUCUCCUCCUCCAG      | CGGTCTCTTCTCCCTCC      | GTGCAGGGTCCGAGGTCAGAGCCACCTGGGCAATTTTTTTTTTCTGGGA  | 2           |
| >hsa-miR-200b-3p MIMAT0000318 | UAAUACUGCCUGGUAUGAUGA    | TTCGGTAATACTGCCTGGTAA  | GTGCAGGGTCCGAGGTCAGAGCCACCTGGGCAATTTTTTTTTTTCATCAT | 3           |
| >hsa-miR-193b-3p MIMAT0002819 | AACUGGCCCUCAAAGUCCCGCU   | CGGAACTGGCCCTCAAAGT    | GTGCAGGGTCCGAGGTCAGAGCCACCTGGGCAATTTTTTTTTTAGCGGG  | 3           |
| >hsa-miR-378a-3p MIMAT0000732 | ACUGGACUUGGAGUCAGAAGGC   | CGGACTGGACTTGGAGTCA    | GTGCAGGGTCCGAGGTCAGAGCCACCTGGGCAATTTTTTTTTTGCCTTC  | 3           |
| >hsa-miR-4323 MIMAT0016875    | CAGCCCCACAGCCUCAG        | GTCGGCAGCCCCACAGC      | GTGCAGGGTCCGAGGTCAGAGCCACCTGGGCAATTTTTTTTTTCTGAGG  | 3           |
| >hsa-miR-502-3p MIMAT0004775  | AAUGCACCUGGGCAAGGAUUA    | TGGAATGCACCTGGGCAAG    | GTGCAGGGTCCGAGGTCAGAGCCACCTGGGCAATTTTTTTTTTTGAATCC | 3           |
| >hsa-miR-335-5p MIMAT0000765  | UCAAGAGCAAUAACGAAAAAUGU  | TCGGTCAAGAGCAATAACGAA  | GTGCAGGGTCCGAGGTCAGAGCCACCTGGGCAATTTTTTTTTTTACATTT | 3           |
| >hsa-miR-296-5p MIMAT0000690  | AGGGCCCCCUCAAUCCUGU      | GGAGGGCCCCCCTCAA       | GTGCAGGGTCCGAGGTCAGAGCCACCTGGGCAATTTTTTTTTTTACAGGA | 3           |
| >hsa-miR-7-1-3p MIMAT0004553  | CAACAAAUCACAGUCUGCCAU    | TTCGGCAACAAATCACAGTCT  | GTGCAGGGTCCGAGGTCAGAGCCACCTGGGCAATTTTTTTTTTTATGGCA | 4           |
| >hsa-miR-103b MIMAT0007402    | UCAUAGCCCUGUACAAUGCUGCU  | CGGTCTAGCCCTGTACAAT    | GTGCAGGGTCCGAGGTCAGAGCCACCTGGGCAATTTTTTTTTTTAGCAGC | 4           |
| >hsa-miR-1231 MIMAT0005586    | GUGUCUGGGCGGACAGCUGC     | CGGGTGTCTGGGCGGAC      | GTGCAGGGTCCGAGGTCAGAGCCACCTGGGCAATTTTTTTTTTTGCAGCT | 4           |
| >hsa-miR-625-3p MIMAT0004808  | GACUAUAGAACUUUCCCCUCA    | TTCGGGACTATAGAATTTCC   | GTGCAGGGTCCGAGGTCAGAGCCACCTGGGCAATTTTTTTTTTTGAGGGG | 4           |
| >hsa-miR-155-5p MIMAT0000646  | UUAAUGC UAAUCGUGAUAGGGGU | TTCGGTAAATGCTAATCGTGAT | GTGCAGGGTCCGAGGTCAGAGCCACCTGGGCAATTTTTTTTTTTACCCCT | 4           |
| >hsa-miR-1225-3p MIMAT0005573 | UGAGCCCCUGUGCCGCCCCAG    | CGGTGAGCCCCGTGTGCC     | GTGCAGGGTCCGAGGTCAGAGCCACCTGGGCAATTTTTTTTTTCTGGGG  | 4           |
| >hsa-miR-184 MIMAT0000454     | UGGACGGAGAACUGAUAGGGU    | CGGTGGACGGGAACTGAT     | GTGCAGGGTCCGAGGTCAGAGCCACCTGGGCAATTTTTTTTTTTACCCTT | 4           |
| >hsa-miR-34c-5p MIMAT0000686  | AGGCAGUGUAGUUAGCUGAUUGC  | TGGAGGCAGTGTAGTTAGCT   | GTGCAGGGTCCGAGGTCAGAGCCACCTGGGCAATTTTTTTTTTTGCAATC | 5           |
| >hsa-miR-3141 MIMAT0015010    | GAGGCGGGUGGAGGAGGA       | TCGGGAGGGCGGGTGA       | GTGCAGGGTCCGAGGTCAGAGCCACCTGGGCAATTTTTTTTTTCTCTCT  | 5           |
| >hsa-miR-330-3p MIMAT0000751  | GCAAAGCACACGGCCUGCAGAGA  | GGCAAAGCACACGGCCTG     | GTGCAGGGTCCGAGGTCAGAGCCACCTGGGCAATTTTTTTTTTCTCTGC  | 5           |
| >hsa-miR-223-5p MIMAT0004570  | CGUGUAUUUGACAAGCUGAGUU   | TCGGCGTGTATTTGACAAGC   | GTGCAGGGTCCGAGGTCAGAGCCACCTGGGCAATTTTTTTTTTTAACTCA | 5           |
| >hsa-miR-422a MIMAT0001339    | ACUGGACUUAAGGGUCAGAAGGC  | CGGACTGGACTTAGGGTCA    | GTGCAGGGTCCGAGGTCAGAGCCACCTGGGCAATTTTTTTTTTTGCCTTC | 5           |
| >hsa-miR-151a-5p MIMAT0004697 | UCGAGGAGCUCACAGUCUAGU    | CGGTGAGGAGCTCACAG      | GTGCAGGGTCCGAGGTCAGAGCCACCTGGGCAATTTTTTTTTTTACTAGA | 5           |
| >hsa-miR-182-5p MIMAT0000259  | UUUGGCAAUGGUAGAACUCACACU | TGGTTTGGCAATGGTAGAACT  | GTGCAGGGTCCGAGGTCAGAGCCACCTGGGCAATTTTTTTTTTTAGTGTG | 5           |
| >hsa-miR-339-5p MIMAT0000764  | UCCUGUCCUCCAGGAGCUCACG   | GTCCCTGTCTCCAGGAG      | GTGCAGGGTCCGAGGTCAGAGCCACCTGGGCAATTTTTTTTTTTCGTGAG | 6           |
| >hsa-miR-100-5p MIMAT0000098  | AACCCGUAUAUCCGAACUUGUG   | CGGAAACCCGTAGATCCGAA   | GTGCAGGGTCCGAGGTCAGAGCCACCTGGGCAATTTTTTTTTTTCACAAG | 6           |

|                                |                         |                        |                                                    |    |
|--------------------------------|-------------------------|------------------------|----------------------------------------------------|----|
| >hsa-miR-23b-5p MIMAT0004587   | UGGGUUCUGGCAUGCUGAUUU   | GGTGGGTTCTGGCATGC      | GTGCAGGGTCCGAGGTCAGAGCCACCTGGGCAATTTTTTTTTTTAAATCA | 6  |
| >hsa-miR-607 MIMAT0003275      | GUUCAAUCCAGAUCUAUAAC    | GTCGGGTCAAATCCAGATC    | GTGCAGGGTCCGAGGTCAGAGCCACCTGGGCAATTTTTTTTTTGTGATA  | 6  |
| >hsa-miR-219a-5p MIMAT0000276  | UGAUUGUCCAAACGCAAUUCU   | TTCGGTGATTGTCCAAACGC   | GTGCAGGGTCCGAGGTCAGAGCCACCTGGGCAATTTTTTTTTTAGAAT   | 6  |
| >hsa-miR-374a-5p MIMAT0000727  | UUAAUACAACCGUAUAGUG     | TGTCGGTTATAATACAACCTGA | GTGCAGGGTCCGAGGTCAGAGCCACCTGGGCAATTTTTTTTTTCACTTA  | 6  |
| >hsa-miR-4651 MIMAT0019715     | CGGGUGGGUGAGGUCGGGC     | TGGCGGGTGGGTGAGG       | GTGCAGGGTCCGAGGTCAGAGCCACCTGGGCAATTTTTTTTTTGCCGA   | 6  |
| >hsa-miR-335-3p MIMAT0004703   | UUUUUCAUUUAUUCUCCUGACC  | TGTCGGTTTTTCATTATTGCTC | GTGCAGGGTCCGAGGTCAGAGCCACCTGGGCAATTTTTTTTTTGTTCAG  | 7  |
| >hsa-miR-196b-3p MIMAT0009201  | UCGACAGCACGACACUGCCUUC  | TGGTCGACAGCACGACACT    | GTGCAGGGTCCGAGGTCAGAGCCACCTGGGCAATTTTTTTTTTGAAGGC  | 7  |
| >hsa-miR-92a-2-5p MIMAT0004508 | GGGUGGGGAUUUGUUGCAUUAC  | TGGGGGTGGGGATTGTG      | GTGCAGGGTCCGAGGTCAGAGCCACCTGGGCAATTTTTTTTTTGTAAATG | 7  |
| >hsa-miR-4258 MIMAT0016879     | CCCCGCCACCGCCUUGG       | GTCGGCCCCGCCACCG       | GTGCAGGGTCCGAGGTCAGAGCCACCTGGGCAATTTTTTTTTTCCAAGG  | 7  |
| >hsa-miR-3653-3p MIMAT0018073  | CUAAGAAGUUGACUGAAG      | TCGGTTCGGCTAAGAAGTTGA  | GTGCAGGGTCCGAGGTCAGAGCCACCTGGGCAATTTTTTTTTTCTTCAG  | 7  |
| >hsa-miR-4286 MIMAT0016916     | ACCCACUCCUGGUACC        | TGGTCGGACCCACTCCT      | GTGCAGGGTCCGAGGTCAGAGCCACCTGGGCAATTTTTTTTTTGGTACC  | 7  |
| >hsa-miR-9-5p MIMAT0000441     | UCUUUGGUUAUCUAGCUGUAUGA | TCGGTCTTTGGTTATCTAGCT  | GTGCAGGGTCCGAGGTCAGAGCCACCTGGGCAATTTTTTTTTTTCATACA | 7  |
| >hsa-miR-329-3p MIMAT0001629   | AACACACCUGGUUAAACCUCUUU | TCGGAACACACCTGGTTAAC   | GTGCAGGGTCCGAGGTCAGAGCCACCTGGGCAATTTTTTTTTTAAAGAG  | 8  |
| >hsa-miR-361-5p MIMAT0000703   | UUUUCAGAAUCUCCAGGGGUAC  | TTCGGTTATCAGAATCTCCAG  | GTGCAGGGTCCGAGGTCAGAGCCACCTGGGCAATTTTTTTTTTGTACCC  | 8  |
| >hsa-miR-199a-5p MIMAT0000231  | CCCAGUGUUCAGACUACCUGUUC | GGCCCAGTGTCAGACTAC     | GTGCAGGGTCCGAGGTCAGAGCCACCTGGGCAATTTTTTTTTTGAACAG  | 8  |
| >hsa-miR-3120-3p MIMAT0014982  | CACAGCAAGUGUAGACAGGCA   | TTCGGCACAGCAAGTGTA     | GTGCAGGGTCCGAGGTCAGAGCCACCTGGGCAATTTTTTTTTTGCCTGT  | 8  |
| >hsa-miR-126-5p MIMAT0000444   | CAUUUUACUUUUGGUACGCG    | GGTCGGCATTATTACTTTTGG  | GTGCAGGGTCCGAGGTCAGAGCCACCTGGGCAATTTTTTTTTTTCGCGTA | 8  |
| >hsa-miR-4301 MIMAT0016850     | UCCACUACUUCACUUGUGA     | GTCGGTCCCCTACTTCAC     | GTGCAGGGTCCGAGGTCAGAGCCACCTGGGCAATTTTTTTTTTTCACAAG | 8  |
| >hsa-miR-503-5p MIMAT0002874   | UAGCAGCGGGAACAGUUCUGCAG | GGTAGCAGCGGGAACAGTT    | GTGCAGGGTCCGAGGTCAGAGCCACCTGGGCAATTTTTTTTTTCTGCAG  | 8  |
| >hsa-miR-485-3p MIMAT0002176   | GUCAUACACGGCUCUCCUCUCU  | TGGGTCATACACGGCTCTC    | GTGCAGGGTCCGAGGTCAGAGCCACCTGGGCAATTTTTTTTTTGTAGAG  | 9  |
| >hsa-miR-18a-5p MIMAT0000072   | UAAGGUGCAUCUAGUGCAGAUAG | TGGTAAGGTGCATCTAGTGC   | GTGCAGGGTCCGAGGTCAGAGCCACCTGGGCAATTTTTTTTTTCTATCT  | 9  |
| >hsa-miR-1277-3p MIMAT0005933  | UACGUAGAUUAUUAUGUAUUUU  | TGTCGGTACGTAGATATATATG | GTGCAGGGTCCGAGGTCAGAGCCACCTGGGCAATTTTTTTTTTAAAATA  | 9  |
| >hsa-miR-654-5p MIMAT0003330   | UGGUGGGCCGCAGAACUUGUC   | TGTGGTGGGCCGCAAGAA     | GTGCAGGGTCCGAGGTCAGAGCCACCTGGGCAATTTTTTTTTTGCACAT  | 9  |
| >hsa-let-7b-3p MIMAT0004482    | CUAACAACCUACUGCCUUC     | TCGGTATACAACCTACTGC    | GTGCAGGGTCCGAGGTCAGAGCCACCTGGGCAATTTTTTTTTTGGGAAG  | 9  |
| >hsa-miR-375 MIMAT0000728      | UUUGUUCGUUCGGCUCGCGUGA  | CGGTTGTTCGTTCCGGCTC    | GTGCAGGGTCCGAGGTCAGAGCCACCTGGGCAATTTTTTTTTTTCACGCG | 9  |
| >hsa-miR-365a-3p MIMAT0000710  | UAAUGCCCCUAAAAUCCUUAU   | GTCGGTAATGCCCTAAAAAT   | GTGCAGGGTCCGAGGTCAGAGCCACCTGGGCAATTTTTTTTTTATAAGG  | 9  |
| >hsa-miR-3135b MIMAT0018985    | GGCUGGAGCGAGUGCAGUGGUG  | TGGGCTGGAGCGAGTGCA     | GTGCAGGGTCCGAGGTCAGAGCCACCTGGGCAATTTTTTTTTTTCACCAC | 10 |
| >hsa-miR-373-5p MIMAT0000725   | ACUCAAAAUGGGGGCGCUUCC   | TGGACTCAAAATGGGGGCG    | GTGCAGGGTCCGAGGTCAGAGCCACCTGGGCAATTTTTTTTTTGGAAAG  | 10 |
| >hsa-miR-424-3p MIMAT0004749   | CAAAACGUGAGGCGCUGCUAU   | CGGCAAAACGTGAGGCGC     | GTGCAGGGTCCGAGGTCAGAGCCACCTGGGCAATTTTTTTTTTATAGCA  | 10 |
| >hsa-miR-181c-5p MIMAT0000258  | AACAUAACCGUCGGUGAGU     | TCGGAACATTCAACCTGTCTG  | GTGCAGGGTCCGAGGTCAGAGCCACCTGGGCAATTTTTTTTTTACTCAC  | 10 |
| >hsa-miR-4454 MIMAT0018976     | GGAUCCGAGUCACGGCACCA    | TCGGGGATCCGAGTACG      | GTGCAGGGTCCGAGGTCAGAGCCACCTGGGCAATTTTTTTTTTGGTGCC  | 10 |
| >hsa-miR-379-5p MIMAT0000733   | UGGUAGACUAUGGAACGUAGG   | GTCGGTGGTAGACTATGGAA   | GTGCAGGGTCCGAGGTCAGAGCCACCTGGGCAATTTTTTTTTTCTTACG  | 10 |
| >hsa-miR-361-3p MIMAT0004682   | UCCCCAGGUGUGAUUCUGAUUU  | TGTCCCCCAGGTGTGATTC    | GTGCAGGGTCCGAGGTCAGAGCCACCTGGGCAATTTTTTTTTTAAATCA  | 10 |
| >hsa-miR-499a-5p MIMAT0002870  | UUAAAGACUUCAGUGAUGUUU   | GTCGGTTAAGACTTGCAGTG   | GTGCAGGGTCCGAGGTCAGAGCCACCTGGGCAATTTTTTTTTTAAACAT  | 11 |
| >hsa-miR-302b-5p MIMAT0000714  | ACUUUAAACUUGAAGUGCUUUC  | GTCGGACTTTAACATGGAAGT  | GTGCAGGGTCCGAGGTCAGAGCCACCTGGGCAATTTTTTTTTTGAAGC   | 11 |
| >hsa-miR-190a-5p MIMAT0000458  | UGAUUGUUUGAUUAUUAGGU    | GGTCGGTGATATGTTTGATATA | GTGCAGGGTCCGAGGTCAGAGCCACCTGGGCAATTTTTTTTTTACCTAA  | 11 |
| >hsa-miR-19b-1-5p MIMAT0004491 | AGUUUUGCAGGUUUGCAUCCAGC | CGGAGTTTTGCAGGTTTGCA   | GTGCAGGGTCCGAGGTCAGAGCCACCTGGGCAATTTTTTTTTTGTCTGGA | 11 |
| >hsa-miR-1246 MIMAT0005898     | AAUGGAUUUUUGGAGCAGG     | CGGTCCGAATGGATTTTTGG   | GTGCAGGGTCCGAGGTCAGAGCCACCTGGGCAATTTTTTTTTTCTGTCT  | 11 |
| >hsa-miR-382-5p MIMAT0000737   | GAAGUUGUUCGUGGUGGAUUCG  | CGGGAAGTTGTTCGTGGTG    | GTGCAGGGTCCGAGGTCAGAGCCACCTGGGCAATTTTTTTTTTTCGAATC | 11 |
| >hsa-miR-598-3p MIMAT0003266   | UACGUCAUCGUUGUCAUCGUCA  | TCGGTACGTCATCGTTGTCA   | GTGCAGGGTCCGAGGTCAGAGCCACCTGGGCAATTTTTTTTTTGACGAT  | 11 |
| >hsa-miR-16-5p MIMAT0000069    | UAGCAGCACGUAAAUUUGGCG   | TTCGGTAGCAGCACGTAATA   | GTGCAGGGTCCGAGGTCAGAGCCACCTGGGCAATTTTTTTTTTTCGCCAA | 12 |
| >hsa-miR-421 MIMAT0003339      | AUCAACAGACAUUAUUGGGCGC  | GTCGGATCAACAGACATTAATT | GTGCAGGGTCCGAGGTCAGAGCCACCTGGGCAATTTTTTTTTTTCGCC   | 12 |
| >hsa-miR-29a-5p MIMAT0004503   | ACUGAUUUUUUGGUGUUCAG    | GTCGGACTGATTTCTTTTGGT  | GTGCAGGGTCCGAGGTCAGAGCCACCTGGGCAATTTTTTTTTTCTGAAC  | 12 |

|                                 |                          |                       |                                                     |    |
|---------------------------------|--------------------------|-----------------------|-----------------------------------------------------|----|
| >hsa-miR-195-5p MIMAT0000461    | UAGCAGCACAGAAAUAUUGGC    | GTCGGTAGCAGCACAGAAAT  | GTGCAGGGTCCGAGGTCAGAGCCACCTGGGCAATTTTTTTTTTTGGCCAAT | 12 |
| >hsa-miR-125a-5p MIMAT0000443   | UCCUCUGAGACCCUUUAACUGUGA | TGTCCTGAGACCCTTTAAAC  | GTGCAGGGTCCGAGGTCAGAGCCACCTGGGCAATTTTTTTTTTTCACAGG  | 12 |
| >hsa-miR-323a-5p MIMAT0004696   | AGGUGGUCCGUGGGCGCUUCCGC  | GAGGTGGTCCGTGGCGC     | GTGCAGGGTCCGAGGTCAGAGCCACCTGGGCAATTTTTTTTTTGGCAAC   | 12 |
| >hsa-miR-7-2-3p MIMAT0004554    | CAACAAAUCCAGUCUACCUAA    | TCGGCAACAATCCCAGTCT   | GTGCAGGGTCCGAGGTCAGAGCCACCTGGGCAATTTTTTTTTTAGGTAG   | 12 |
| >hsa-miR-193b-5p MIMAT0004767   | CGGGUUUUUGAGGGCGAGAUGA   | TCCGGGGTTTTGAGGGCG    | GTGCAGGGTCCGAGGTCAGAGCCACCTGGGCAATTTTTTTTTTTCATCTC  | 13 |
| >hsa-miR-371b-5p MIMAT0019892   | ACUCAAAGAUGGCGCACUUU     | CGGACTCAAAAGATGGCGG   | GTGCAGGGTCCGAGGTCAGAGCCACCTGGGCAATTTTTTTTTTAAAGTG   | 13 |
| >hsa-miR-219a-1-3p MIMAT0004567 | AGAGUUGAGUCUGGACGUCCCG   | CGGAGAGTTGAGTCTGGAC   | GTGCAGGGTCCGAGGTCAGAGCCACCTGGGCAATTTTTTTTTTTCGGGAC  | 13 |
| >hsa-miR-378b MIMAT0014999      | ACUGGACUUGGAGGCAGAA      | TGTCGGACTGGACTTGGAG   | GTGCAGGGTCCGAGGTCAGAGCCACCTGGGCAATTTTTTTTTTCTGCCT   | 13 |
| >hsa-miR-214-3p MIMAT0000271    | ACAGCAGGCACAGACAGGCAGU   | TGGACAGCAGGCACAGACA   | GTGCAGGGTCCGAGGTCAGAGCCACCTGGGCAATTTTTTTTTTACTGCC   | 13 |
| >hsa-miR-217 MIMAT0000274       | UACUGCAUCAGGAACUGAUUGGA  | TGGTACTGCATCAGGAAGT   | GTGCAGGGTCCGAGGTCAGAGCCACCTGGGCAATTTTTTTTTTCCAATC   | 13 |
| >hsa-miR-3689a-5p MIMAT0018117  | UGUGAUUCAUGGUUCCUGGGA    | TTCGGTGTGATATCATGGTTC | GTGCAGGGTCCGAGGTCAGAGCCACCTGGGCAATTTTTTTTTTCCCAGG   | 13 |
| >hsa-miR-3163 MIMAT0015037      | UAUAAAAUGAGGGCAGUAAGAC   | TTCGGTATAAAATGAGGGCAG | GTGCAGGGTCCGAGGTCAGAGCCACCTGGGCAATTTTTTTTTTGTCTTA   | 14 |
| >hsa-let-7f-2-3p MIMAT0004487   | CUAUACAGUCUACUGUCUUUCC   | TTCGGCTATACAGTCTACTGT | GTGCAGGGTCCGAGGTCAGAGCCACCTGGGCAATTTTTTTTTTGGAAAG   | 14 |
| >hsa-miR-3622a-5p MIMAT0018003  | CAGGCACGGGAGCUCAGGUGAG   | TGCAGGCACGGGAGCTCA    | GTGCAGGGTCCGAGGTCAGAGCCACCTGGGCAATTTTTTTTTTCTCACC   | 14 |
| >hsa-miR-1290 MIMAT0005880      | UGGAUUUUUGGAUCAGGGA      | CGGTCCGGTGGATTTTTGGAT | GTGCAGGGTCCGAGGTCAGAGCCACCTGGGCAATTTTTTTTTTCCCTGA   | 14 |
| >hsa-miR-1976 MIMAT0009451      | CCUCCUGCCCUCCUUGCUGU     | CGGCCTCCTGCCTCCT      | GTGCAGGGTCCGAGGTCAGAGCCACCTGGGCAATTTTTTTTTTACAGCA   | 14 |
| >hsa-miR-339-3p MIMAT0004702    | UGAGCGCCUCGACGACAGAGCCG  | GTGAGCGCCTCGACGACA    | GTGCAGGGTCCGAGGTCAGAGCCACCTGGGCAATTTTTTTTTTTCGGCTC  | 14 |
| >hsa-miR-1287-5p MIMAT0005878   | UGCUGGAUCAGUGGUUCGAGUC   | CGGTGCTGGATCAGTGGTT   | GTGCAGGGTCCGAGGTCAGAGCCACCTGGGCAATTTTTTTTTTGACTCG   | 14 |
| >hsa-miR-2467-3p MIMAT0019953   | AGCAGAGGCAGAGAGGCUCAGG   | GGAGCAGAGGCAGAGAGG    | GTGCAGGGTCCGAGGTCAGAGCCACCTGGGCAATTTTTTTTTTCTGAG    | 15 |
| >hsa-miR-3176 MIMAT0015053      | ACUGGCCUGGGACUACCGG      | TTCGGACTGGCTGGGAC     | GTGCAGGGTCCGAGGTCAGAGCCACCTGGGCAATTTTTTTTTTCCGGTA   | 15 |
| >hsa-miR-519b-5p MIMAT0005454   | CUCUAGAGGGAAGCGCUUUCUG   | GGCTCTAGAGGGAAGCGC    | GTGCAGGGTCCGAGGTCAGAGCCACCTGGGCAATTTTTTTTTTTCAGAAA  | 15 |
| >hsa-miR-202-3p MIMAT0002811    | AGAGGUUAUAGGGCAUGGGAA    | GTCGGAGAGGTATAGGGCA   | GTGCAGGGTCCGAGGTCAGAGCCACCTGGGCAATTTTTTTTTTCCCATG   | 15 |
| >hsa-miR-3074-3p MIMAT0015027   | GAUAUCAGCUCAGUAGGCACCG   | TCGGGATATCAGCTCAGTAG  | GTGCAGGGTCCGAGGTCAGAGCCACCTGGGCAATTTTTTTTTTCGGTGC   | 15 |
| >hsa-miR-1260a MIMAT0005911     | AUCCACCUCUAGCCACCA       | GGTCGGATCCCACCTCTG    | GTGCAGGGTCCGAGGTCAGAGCCACCTGGGCAATTTTTTTTTTTGGTGC   | 15 |
| >hsa-miR-19b-2-5p MIMAT0004492  | AGUUUUGCAGUUUGCAUUUCA    | TCGGAGTTTTGAGGTTTGC   | GTGCAGGGTCCGAGGTCAGAGCCACCTGGGCAATTTTTTTTTTGAAATG   | 15 |
| >hsa-miR-143-3p MIMAT0000435    | UGAGAUGAAGCACUGUAGCUC    | TTCGGTGAGATGAAGCACTG  | GTGCAGGGTCCGAGGTCAGAGCCACCTGGGCAATTTTTTTTTTGAGCTA   | 16 |
| >hsa-miR-410-3p MIMAT0002171    | AAUAUAAACACAGAUGGCCUGU   | GGTCGGAATATAACACAGATG | GTGCAGGGTCCGAGGTCAGAGCCACCTGGGCAATTTTTTTTTTACAGGC   | 16 |
| >hsa-miR-551b-3p MIMAT0003233   | GCGACCCAUACUUGGUUUCAG    | CGGGCGACCCATACTTGG    | GTGCAGGGTCCGAGGTCAGAGCCACCTGGGCAATTTTTTTTTTCTGAAA   | 16 |
| >hsa-miR-27a-3p MIMAT0000084    | UUCACAGUGGCUAAGUUCGCG    | TTCGGTTCACAGTGGCTAAG  | GTGCAGGGTCCGAGGTCAGAGCCACCTGGGCAATTTTTTTTTTTCGGAA   | 16 |
| >hsa-miR-1180-3p MIMAT0005825   | UUUCCGGCUCGCGUGGGUGUGU   | TGTTCCGGCTCGCGTGG     | GTGCAGGGTCCGAGGTCAGAGCCACCTGGGCAATTTTTTTTTTACACAC   | 16 |
| >hsa-miR-4423-5p MIMAT0019232   | AGUUGCCUUUUUGUCCCAUGC    | TTCGGAGTTGCCTTTTTGTTC | GTGCAGGGTCCGAGGTCAGAGCCACCTGGGCAATTTTTTTTTTGCATGG   | 16 |
| >hsa-miR-423-5p MIMAT0004748    | UGAGGGCAGAGAGCGAGACUUU   | GTGAGGGCAGAGAGCGA     | GTGCAGGGTCCGAGGTCAGAGCCACCTGGGCAATTTTTTTTTTAAAGTC   | 16 |
| >hsa-miR-615-5p MIMAT0004804    | GGGGUCCCCGGUGCUCGGAUC    | TGGGGTCCCCGGTGTCT     | GTGCAGGGTCCGAGGTCAGAGCCACCTGGGCAATTTTTTTTTTGATCCG   | 17 |
| >hsa-miR-185-5p MIMAT0000455    | UGGAGAGAAAGGCAGUCCUGA    | CGGTGGAGAGAAAGGCAGT   | GTGCAGGGTCCGAGGTCAGAGCCACCTGGGCAATTTTTTTTTTTCAGGAA  | 17 |
| >hsa-miR-181b-5p MIMAT0000257   | AACAUAUCUUGCUGCGGUGGGU   | CGGAACATTCATTGCTGTCTG | GTGCAGGGTCCGAGGTCAGAGCCACCTGGGCAATTTTTTTTTTACCAC    | 17 |
| >hsa-miR-7703 MIMAT0030018      | UUGCACUCUGCCUUCUCCAGG    | GGTTGCACTTGGCCTTCT    | GTGCAGGGTCCGAGGTCAGAGCCACCTGGGCAATTTTTTTTTTCTGGG    | 17 |
| >hsa-miR-148b-3p MIMAT0000759   | UCAGUGCAUCACAGAACUUUGU   | TCGGTCAGTGCATCACAGAA  | GTGCAGGGTCCGAGGTCAGAGCCACCTGGGCAATTTTTTTTTTACAAG    | 17 |
| >hsa-miR-25-3p MIMAT0000081     | CAUUGCACUUGUCUCGGUCUGA   | CGGCATTGCCTTGTCTCG    | GTGCAGGGTCCGAGGTCAGAGCCACCTGGGCAATTTTTTTTTTTCAGACC  | 17 |
| >hsa-miR-99b-5p MIMAT0000689    | CACCCGUAGAACCGACCUUGCG   | GGCACCCGTAGAACCAGC    | GTGCAGGGTCCGAGGTCAGAGCCACCTGGGCAATTTTTTTTTTTCGCAAG  | 17 |
| >hsa-miR-628-3p MIMAT0003297    | UCUAGUAAGAGUGGCAGUCGA    | TTCGGTCTAGTAAGAGTGGC  | GTGCAGGGTCCGAGGTCAGAGCCACCTGGGCAATTTTTTTTTTTCGACTG  | 18 |
| >hsa-miR-151b MIMAT0010214      | UCGAGGAGCUCACAGUCU       | GGTCGGTTCGAGGAGCTCA   | GTGCAGGGTCCGAGGTCAGAGCCACCTGGGCAATTTTTTTTTTAGACTG   | 18 |
| >hsa-miR-6876-5p MIMAT0027652   | CAGGAAGGAGACAGGCAGUUA    | GGCAGGAAGGAGACAGGC    | GTGCAGGGTCCGAGGTCAGAGCCACCTGGGCAATTTTTTTTTTGAAGT    | 18 |
| >hsa-miR-550a-5p MIMAT0004800   | AGUGCCUGAGGGAGUAAGAGCCC  | GGAGTGCCTGAGGGAGTAA   | GTGCAGGGTCCGAGGTCAGAGCCACCTGGGCAATTTTTTTTTTGGGCTC   | 18 |

|                                |                            |                        |                                                    |    |
|--------------------------------|----------------------------|------------------------|----------------------------------------------------|----|
| >hsa-miR-505-3p MIMAT0002876   | CGUCAACACUUGCUGGUUUCU      | TGGCGTCAACACTTGCTGG    | GTGCAGGGTCCGAGGTCAGAGCCACCTGGGCAATTTTTTTTTTTAGGAAA | 18 |
| >hsa-miR-205-5p MIMAT0000266   | UCCUUCAUUCCACCGGAGUCUG     | TGGTCCTTCATTCCACCGG    | GTGCAGGGTCCGAGGTCAGAGCCACCTGGGCAATTTTTTTTTTTCAGATA | 18 |
| >hsa-miR-224-5p MIMAT0000281   | CAAGUCACUAGUGGUUCCGUU      | TTCGGCAAGTCACTAGTGGT   | GTGCAGGGTCCGAGGTCAGAGCCACCTGGGCAATTTTTTTTTTAAACGGA | 18 |
| >hsa-miR-138-5p MIMAT0000430   | AGCUGGUGUUGUGAAUCAGGCCG    | TGGAGCTGGTGTGTGAATC    | GTGCAGGGTCCGAGGTCAGAGCCACCTGGGCAATTTTTTTTTTCGGCCT  | 19 |
| >hsa-miR-340-3p MIMAT0000750   | UCCGUCUCAGUUACUUUAAGC      | TCCGTCCGTCTCAGTTACTT   | GTGCAGGGTCCGAGGTCAGAGCCACCTGGGCAATTTTTTTTTTGCTATA  | 19 |
| >hsa-miR-874-3p MIMAT0004911   | CUGCCCUGCCCCAGGGACCGA      | TCTGCCCTGGCCCAGG       | GTGCAGGGTCCGAGGTCAGAGCCACCTGGGCAATTTTTTTTTTCGGTCC  | 19 |
| >hsa-miR-1537-3p MIMAT0007399  | AAAACCGUCUAGUUACAGUUGU     | TTCGGAAAACCGTCTAGTTAC  | GTGCAGGGTCCGAGGTCAGAGCCACCTGGGCAATTTTTTTTTTACAAC   | 19 |
| >hsa-miR-145-3p MIMAT0004601   | GGAUUCCUGGAAUACUGUUCU      | TCGGGGATTCTGGAAATAC    | GTGCAGGGTCCGAGGTCAGAGCCACCTGGGCAATTTTTTTTTTAGAACA  | 19 |
| >hsa-miR-652-3p MIMAT0003322   | AAUGGCGCCACUAGGGUUGUG      | CGGAATGGCGCCACTAGG     | GTGCAGGGTCCGAGGTCAGAGCCACCTGGGCAATTTTTTTTTTTCACAAC | 19 |
| >hsa-miR-130a-3p MIMAT0000425  | CAGUGCAAUGUAAAAGGGCAU      | GTCGGCAGTGAATGTTAAAA   | GTGCAGGGTCCGAGGTCAGAGCCACCTGGGCAATTTTTTTTTTATGCC   | 19 |
| >hsa-miR-19a-3p MIMAT0000073   | UGUGCAAUUCUAGCAAACUGA      | TCGGTGTGCAAATCTATGCAA  | GTGCAGGGTCCGAGGTCAGAGCCACCTGGGCAATTTTTTTTTTTCAGTTT | 20 |
| >hsa-miR-451a MIMAT0001631     | AAACCGUUACCAUACUGAGUU      | TTCGGAAACCGTTACCATTAC  | GTGCAGGGTCCGAGGTCAGAGCCACCTGGGCAATTTTTTTTTTAACTCA  | 20 |
| >hsa-miR-144-5p MIMAT0004600   | GGAUUCAUCAUACUGUAAG        | GTCGGGGATATCATATATAC   | GTGCAGGGTCCGAGGTCAGAGCCACCTGGGCAATTTTTTTTTTCTTACA  | 20 |
| >hsa-miR-92a-3p MIMAT0000092   | UAUUGCACUUGUCCCGCCUGU      | CGGTATTGCACTTGTC       | GTGCAGGGTCCGAGGTCAGAGCCACCTGGGCAATTTTTTTTTTACAGGC  | 20 |
| >hsa-miR-218-1-3p MIMAT0004565 | AUGGUUCCGUCAAGCACAUGG      | CGGATGGTCCGTCAAGCA     | GTGCAGGGTCCGAGGTCAGAGCCACCTGGGCAATTTTTTTTTTCCATGG  | 20 |
| >hsa-miR-486-3p MIMAT0004762   | CGGGCAGCUCAGUACAGGAU       | TGGCGGGCAGCTCAGTA      | GTGCAGGGTCCGAGGTCAGAGCCACCTGGGCAATTTTTTTTTTATCCTG  | 20 |
| >hsa-miR-627-5p MIMAT0003296   | GUGAGUCUCUAAAGAAAAGAGGA    | TTCGGGTGAGTCTTAAGAAA   | GTGCAGGGTCCGAGGTCAGAGCCACCTGGGCAATTTTTTTTTTCTCTT   | 20 |
| >hsa-miR-1183 MIMAT0005828     | CACUGUAGGUGAUGGUGAGAGUGGGC | CACTGTAGGTGATGGTGAGAG  | GTGCAGGGTCCGAGGTCAGAGCCACCTGGGCAATTTTTTTTTTGCCAC   | 21 |
| >hsa-miR-126-3p MIMAT0000445   | UCGUACCGUGAGUAAUAAUGCG     | TCGGTTCGTACCGTGAGTAAT  | GTGCAGGGTCCGAGGTCAGAGCCACCTGGGCAATTTTTTTTTTTCGCATT | 21 |
| >hsa-let-7c-5p MIMAT0000064    | UGAGGUAGUAGGUUGUAUGGUU     | TCGGTGTAGGTAGTAGGTTGT  | GTGCAGGGTCCGAGGTCAGAGCCACCTGGGCAATTTTTTTTTTAAACCAT | 21 |
| >hsa-miR-30b-5p MIMAT0000420   | UGUAAAACUCCUACACUCAGCU     | TTCGGTGTAAACATCCTACAC  | GTGCAGGGTCCGAGGTCAGAGCCACCTGGGCAATTTTTTTTTTAGCTGA  | 21 |
| >hsa-miR-378i MIMAT0019074     | ACUGGACUAGGAGUCAGAAGG      | TCGGACTGGACTAGGAGTC    | GTGCAGGGTCCGAGGTCAGAGCCACCTGGGCAATTTTTTTTTTCTTCT   | 21 |
| >hsa-miR-3200-5p MIMAT0017392  | AAUCUGAGAAGGCGCAAAGGU      | CGGAATCTGAGAAGGCGCA    | GTGCAGGGTCCGAGGTCAGAGCCACCTGGGCAATTTTTTTTTTACCTTG  | 21 |
| >hsa-miR-2355-3p MIMAT0017950  | AUUGUCCUUGCUGUUUGGAGAU     | TTCGGATTGTCCTTGCTGTTT  | GTGCAGGGTCCGAGGTCAGAGCCACCTGGGCAATTTTTTTTTTATCTCC  | 21 |
| >hsa-miR-204-5p MIMAT0000265   | UCCCUUUGUCAUCCUAGCCU       | TCGGTCCCTTTGTCACTCT    | GTGCAGGGTCCGAGGTCAGAGCCACCTGGGCAATTTTTTTTTTAGGCAT  | 22 |
| >hsa-miR-26a-1-3p MIMAT0004499 | CCUAUUCUUGGUUACUUGCACG     | TTCGGCCTATTCTTGTTACT   | GTGCAGGGTCCGAGGTCAGAGCCACCTGGGCAATTTTTTTTTTCTGTCA  | 22 |
| >hsa-miR-18b-5p MIMAT0001412   | UAAGGUGCAUCUAGUGCAGUUAG    | TGGTAAGGTGCATCTAGTGC   | GTGCAGGGTCCGAGGTCAGAGCCACCTGGGCAATTTTTTTTTTCTAACT  | 22 |
| >hsa-miR-20b-3p MIMAT0004752   | ACUGUAGUAUGGGCACUCCAG      | CGGACTGTAGTATGGGCAC    | GTGCAGGGTCCGAGGTCAGAGCCACCTGGGCAATTTTTTTTTTCTGGAA  | 22 |
| >hsa-miR-338-5p MIMAT0004701   | AACAUAUCCUGGUGCUGAGUG      | TCGGAACAATATCTGGTGC    | GTGCAGGGTCCGAGGTCAGAGCCACCTGGGCAATTTTTTTTTTCACTCA  | 22 |
| >hsa-miR-517a-3p MIMAT0002852  | AUCGUGCAUCCUUUAGAGUGU      | TCGGATCGTGCATCCCTTTA   | GTGCAGGGTCCGAGGTCAGAGCCACCTGGGCAATTTTTTTTTTACTCTC  | 22 |
| >hsa-miR-542-3p MIMAT0003389   | UGUGACAGAUUGUAACUGAAA      | TGTCGGTGTGACAGATTGATA  | GTGCAGGGTCCGAGGTCAGAGCCACCTGGGCAATTTTTTTTTTTCAGTTA | 22 |
| >hsa-miR-28-3p MIMAT0004502    | CACUAGAUUGUGAGCUCCUGGA     | TCGGCACTAGATTGTGAGCT   | GTGCAGGGTCCGAGGTCAGAGCCACCTGGGCAATTTTTTTTTTCCAGGA  | 23 |
| >hsa-miR-4687-5p MIMAT0019774  | CAGCCUCCUCCCGACCCAAA       | TGCAGCCCTCTCCCGC       | GTGCAGGGTCCGAGGTCAGAGCCACCTGGGCAATTTTTTTTTTGGGTGC  | 23 |
| >hsa-miR-148a-3p MIMAT0000243  | UCAGUGCACUACAGAACUUUGU     | TCGGTCAGTGCACACTACAGAA | GTGCAGGGTCCGAGGTCAGAGCCACCTGGGCAATTTTTTTTTTACAAA   | 23 |
| >hsa-miR-10b-5p MIMAT0000254   | UACCCUGUAGAACCGAAUUUGUG    | TGGTACCCTGTAGAACCGAA   | GTGCAGGGTCCGAGGTCAGAGCCACCTGGGCAATTTTTTTTTTTCACAAA | 23 |
| >hsa-miR-4296 MIMAT0016845     | AUGUGGGCUCAGGCUCA          | CGGTCCGATGTGGGCTCA     | GTGCAGGGTCCGAGGTCAGAGCCACCTGGGCAATTTTTTTTTTGTAGCCT | 23 |
| >hsa-miR-10a-5p MIMAT0000253   | UACCCUGUAGAUCGAAUUUGUG     | TGGTACCCTGTAGATCCGAA   | GTGCAGGGTCCGAGGTCAGAGCCACCTGGGCAATTTTTTTTTTTCACAAA | 23 |
| >hsa-miR-19b-3p MIMAT0000074   | UGUGCAAUCCAUGCAAACUGA      | CGGTGTGCAAATCCATGCAA   | GTGCAGGGTCCGAGGTCAGAGCCACCTGGGCAATTTTTTTTTTTCAGTTT | 23 |
| >hsa-miR-629-5p MIMAT0004810   | UGGGUUACGUUGGGGAGAACU      | TCGGTGGGTTTACGTTGGG    | GTGCAGGGTCCGAGGTCAGAGCCACCTGGGCAATTTTTTTTTTAGTTCT  | 24 |
| >hsa-miR-4505 MIMAT0019041     | AGGCUGGGCUGGGACCGA         | GTCGGAGGCTGGGCTGG      | GTGCAGGGTCCGAGGTCAGAGCCACCTGGGCAATTTTTTTTTTCCGTCC  | 24 |
| >hsa-miR-211-5p MIMAT0000268   | UUCUUUUGUCAUCCUUCGCCU      | TCGGTTCCTTTGTCACTCT    | GTGCAGGGTCCGAGGTCAGAGCCACCTGGGCAATTTTTTTTTTAGGCGA  | 24 |
| >hsa-miR-1286 MIMAT0005877     | UGCAGGACCAAGAUGAGCCCU      | TCGGTGCAGGACCAAGATG    | GTGCAGGGTCCGAGGTCAGAGCCACCTGGGCAATTTTTTTTTTAGGGCT  | 24 |
| >hsa-miR-532-5p MIMAT0002888   | CAUGCCUUGAGUGUAGGACCGU     | CGGCATGCCTTGAGTGTAG    | GTGCAGGGTCCGAGGTCAGAGCCACCTGGGCAATTTTTTTTTTACGGTC  | 24 |

|                               |                         |                        |                                                    |    |
|-------------------------------|-------------------------|------------------------|----------------------------------------------------|----|
| >hsa-miR-450a-5p MIMAT0001545 | UUUUGCGAUGUGUUCUAAUUAU  | TCGGTTTTGCGATGTGTTC    | GTGCAGGGTCCGAGGTCAGAGCCACCTGGGCAATTTTTTTTTTATATTA  | 24 |
| >hsa-miR-139-3p MIMAT0004552  | UGGAGACGCGGCCUGUUGAGU   | TTGGAGACGCGGCCCTGT     | GTGCAGGGTCCGAGGTCAGAGCCACCTGGGCAATTTTTTTTTTACTCCA  | 24 |
| >hsa-miR-519e-3p MIMAT0002829 | AAGUGCCUCCUUUAGAGUGU    | TCGGAAGTGCCTCCTTTAG    | GTGCAGGGTCCGAGGTCAGAGCCACCTGGGCAATTTTTTTTTTAACACT  | 25 |
| >hsa-miR-548e-3p MIMAT0005874 | AAAAACUGAGACUACUUUUGCA  | GTCGGAAAAACTGAGACTACT  | GTGCAGGGTCCGAGGTCAGAGCCACCTGGGCAATTTTTTTTTTGCAAAA  | 25 |
| >hsa-miR-377-3p MIMAT0000730  | AUCACACAAAGGCAACUUUUGU  | TCCGATCACACAAAGGCAAC   | GTGCAGGGTCCGAGGTCAGAGCCACCTGGGCAATTTTTTTTTTACAAAA  | 25 |
| >hsa-miR-3183 MIMAT0015063    | GCCUCUCUCGGAGUCGUCGGA   | TGGCCTCTCTCGGAGTCG     | GTGCAGGGTCCGAGGTCAGAGCCACCTGGGCAATTTTTTTTTTCCGAGC  | 25 |
| >hsa-miR-34a-5p MIMAT0000255  | UGGCAGUGUCUUAGCUGGUUGU  | CGGTGGCAGTGTCTTAGCT    | GTGCAGGGTCCGAGGTCAGAGCCACCTGGGCAATTTTTTTTTTACAAACC | 25 |
| >hsa-miR-302a-3p MIMAT0000684 | UAAGUGCUUCCAUGUUUUGGUGA | TCGGTAAGTGCTTCCATGTTT  | GTGCAGGGTCCGAGGTCAGAGCCACCTGGGCAATTTTTTTTTTACCACC  | 25 |
| >hsa-miR-4328 MIMAT0016926    | CCAGUUUCCAGGAUU         | CGGTGCGCCAGTTTTCCC     | GTGCAGGGTCCGAGGTCAGAGCCACCTGGGCAATTTTTTTTTTAATCCT  | 25 |
| >hsa-miR-551a MIMAT0003214    | GCGACCCACUCUUGGUUUCCA   | TGGGCGACCCACTCTTGG     | GTGCAGGGTCCGAGGTCAGAGCCACCTGGGCAATTTTTTTTTTGGAAAC  | 26 |
| >hsa-miR-345-5p MIMAT0000772  | GCUGACUCCUAGUCCAGGGCUC  | TGGGCTGACTCTAGTCCA     | GTGCAGGGTCCGAGGTCAGAGCCACCTGGGCAATTTTTTTTTTGAGCCC  | 26 |
| >hsa-miR-675-3p MIMAT0006790  | CUGUAUGCCCUCACCGCUCA    | TTCGGCTGTATGCCCTCAC    | GTGCAGGGTCCGAGGTCAGAGCCACCTGGGCAATTTTTTTTTTGAGCGG  | 26 |
| >hsa-miR-4464 MIMAT0018988    | AAGGUUUGGAUAGAUGCAAUA   | TGTCGGAAGGTTTGATAGAT   | GTGCAGGGTCCGAGGTCAGAGCCACCTGGGCAATTTTTTTTTTATTGCA  | 26 |
| >hsa-miR-99a-5p MIMAT0000097  | AACCCGUAGAUCCGAUCUUGUG  | CGGAACCCGTAGATCCGAT    | GTGCAGGGTCCGAGGTCAGAGCCACCTGGGCAATTTTTTTTTTTCACAAG | 26 |
| >hsa-miR-128-3p MIMAT0000424  | UCACAGUGAACCGGUCUCUUU   | TCGGTCACAGTGAACCGGT    | GTGCAGGGTCCGAGGTCAGAGCCACCTGGGCAATTTTTTTTTTAAAGAG  | 26 |
| >hsa-miR-1247-5p MIMAT0005899 | ACCCGUCCCGUUCGUCCCCGGA  | TGACCCGTCCCGTTCGTC     | GTGCAGGGTCCGAGGTCAGAGCCACCTGGGCAATTTTTTTTTTCCGGGG  | 26 |
| >hsa-miR-671-3p MIMAT0004819  | UCCGGUUCUCAGGGCUCACC    | TGGTCCGGTTCTCAGGGC     | GTGCAGGGTCCGAGGTCAGAGCCACCTGGGCAATTTTTTTTTTGGTGGA  | 27 |
| >hsa-miR-429 MIMAT0001536     | UAAUACUGUCUGGUAACCCGU   | GTCGGTAATACTGTCTGGTAA  | GTGCAGGGTCCGAGGTCAGAGCCACCTGGGCAATTTTTTTTTTACGGTT  | 27 |
| >hsa-miR-4732-3p MIMAT0019856 | GCCCUGACCUGUCCUGUUCUG   | TGGGCCCTGACCTGTCT      | GTGCAGGGTCCGAGGTCAGAGCCACCTGGGCAATTTTTTTTTTACAGAAC | 27 |
| >hsa-miR-325 MIMAT0000771     | CCUAGUAGGUGUCCAGUAAGUGU | GGCCTAGTAGGTGTCCAGT    | GTGCAGGGTCCGAGGTCAGAGCCACCTGGGCAATTTTTTTTTTACTACT  | 27 |
| >hsa-miR-380-5p MIMAT0000734  | UGGUUGACCAUAGAACAUGCGC  | TCGGTGGTTGACCATAGAAC   | GTGCAGGGTCCGAGGTCAGAGCCACCTGGGCAATTTTTTTTTTGCGCAT  | 27 |
| >hsa-miR-489-3p MIMAT0002805  | GUGACAUCACAUACGGCAGC    | TTCGGGTGACATCACATATAC  | GTGCAGGGTCCGAGGTCAGAGCCACCTGGGCAATTTTTTTTTTGCTGCC  | 27 |
| >hsa-miR-29c-5p MIMAT0004673  | UGACCGAUUUCUCCUGGUGUUC  | CGGTGACCGATTCTCCTG     | GTGCAGGGTCCGAGGTCAGAGCCACCTGGGCAATTTTTTTTTTGAACAC  | 27 |
| >hsa-miR-146a-5p MIMAT0000449 | UGAGAUCUGAAUCCAUGGGUU   | TTCGGTGAGAACTGAATTCCA  | GTGCAGGGTCCGAGGTCAGAGCCACCTGGGCAATTTTTTTTTTAAACCCA | 28 |
| >hsa-miR-448 MIMAT0001532     | UUGCAUAUGUAGGAUGUCCCAU  | TTCGGTTGCATATGTAGGATG  | GTGCAGGGTCCGAGGTCAGAGCCACCTGGGCAATTTTTTTTTTATGGGA  | 28 |
| >hsa-miR-433-3p MIMAT0001627  | AUCAUGAUGGGCUCUCGUGU    | CGGATCATGATGGGCTCCT    | GTGCAGGGTCCGAGGTCAGAGCCACCTGGGCAATTTTTTTTTTACACCG  | 28 |
| >hsa-miR-519d-3p MIMAT0002853 | CAAAGUGCCUCCUUAAGAGUG   | CGGCAAAAGTGCTCCCTTT    | GTGCAGGGTCCGAGGTCAGAGCCACCTGGGCAATTTTTTTTTTCACTCT  | 28 |
| >hsa-miR-326 MIMAT0000756     | CCUCUGGGCCUUCUCCAG      | CGGCCTCTGGGCCCTTC      | GTGCAGGGTCCGAGGTCAGAGCCACCTGGGCAATTTTTTTTTTCTGGAG  | 28 |
| >hsa-miR-199b-5p MIMAT0000263 | CCCAGUGUUUAGACUAUCUGUUC | CGGCCAGTGTTTAGACTAT    | GTGCAGGGTCCGAGGTCAGAGCCACCTGGGCAATTTTTTTTTTGAACAG  | 28 |
| >hsa-miR-30b-3p MIMAT0004589  | CUGGGAGGUGGAUGUUACUUC   | TGGCTGGGAGGTGGATGTT    | GTGCAGGGTCCGAGGTCAGAGCCACCTGGGCAATTTTTTTTTTGAAGTA  | 28 |
| >hsa-miR-199a-3p MIMAT0000232 | ACAGUAGUCUGCACAUUGGUUA  | TCGGACAGTAGTCTGCACAT   | GTGCAGGGTCCGAGGTCAGAGCCACCTGGGCAATTTTTTTTTTAAACCA  | 29 |
| >hsa-miR-337-3p MIMAT0000754  | CUCCUAUAUGAUGCCUUUCUUC  | TCGGCTCCTATATGATGCCT   | GTGCAGGGTCCGAGGTCAGAGCCACCTGGGCAATTTTTTTTTTGAAGAA  | 29 |
| >hsa-miR-1249-3p MIMAT0005901 | ACGCCUUCCCCCUUCUUCA     | GACGCCCTCCCCCCC        | GTGCAGGGTCCGAGGTCAGAGCCACCTGGGCAATTTTTTTTTTGAAGAA  | 29 |
| >hsa-miR-3159 MIMAT0015033    | UAGGAUUACAAGUGUCGGCCAC  | TTCGGTAGGATTACAAGTGTCT | GTGCAGGGTCCGAGGTCAGAGCCACCTGGGCAATTTTTTTTTTGTGGCC  | 29 |
| >hsa-miR-9-3p MIMAT0000442    | AUAAAGCUAGAUACCGAAAGU   | GTCGGATAAAGCTAGATAACC  | GTGCAGGGTCCGAGGTCAGAGCCACCTGGGCAATTTTTTTTTTACTTTC  | 29 |
| >hsa-miR-20b-5p MIMAT0001413  | CAAAGUGCUCUAGUGCAGGUAG  | TGGCAAAAGTGCTCATAGTGC  | GTGCAGGGTCCGAGGTCAGAGCCACCTGGGCAATTTTTTTTTTCTACCT  | 29 |
| >hsa-miR-152-3p MIMAT0000438  | UCAGUGCAUGACAGAACUUGG   | TTCGGTCAAGTGCATGACAGA  | GTGCAGGGTCCGAGGTCAGAGCCACCTGGGCAATTTTTTTTTTCCAAGT  | 29 |
| >hsa-miR-548d-5p MIMAT0004812 | AAAAGUAAUUGUGGUUUUUGCC  | TGTCGGAAAAGTAATTGTGGTT | GTGCAGGGTCCGAGGTCAGAGCCACCTGGGCAATTTTTTTTTTGGCAAA  | 30 |
| >hsa-miR-142-5p MIMAT0000433  | CAUAAAGUAGAAAGCACUACU   | TGTCGGCATAAAAGTAGAAAGC | GTGCAGGGTCCGAGGTCAGAGCCACCTGGGCAATTTTTTTTTTAGTAGT  | 30 |
| >hsa-miR-20a-5p MIMAT0000075  | UAAAGUGCUCUAGUGCAGGUAG  | TCGGTAAAGTGCTTATAGTGC  | GTGCAGGGTCCGAGGTCAGAGCCACCTGGGCAATTTTTTTTTTCTACCT  | 30 |
| >hsa-miR-507 MIMAT0002879     | UUUUGCACCUUUUGGAGUGAA   | GTCGGTTTTGCACCTTTTGG   | GTGCAGGGTCCGAGGTCAGAGCCACCTGGGCAATTTTTTTTTTCACTCC  | 30 |
| >hsa-miR-374b-5p MIMAT0004955 | AUAUAAUACAACCUAGUAGUG   | GTCGGATATAATACAACCTGC  | GTGCAGGGTCCGAGGTCAGAGCCACCTGGGCAATTTTTTTTTTCACTTA  | 30 |
| >hsa-miR-5095 MIMAT0020600    | UUACAGGCGUGAACCCGCG     | TCGGTTACAGCGTGAACC     | GTGCAGGGTCCGAGGTCAGAGCCACCTGGGCAATTTTTTTTTTTCGCGGT | 30 |

|                                |                          |                         |                                                     |    |
|--------------------------------|--------------------------|-------------------------|-----------------------------------------------------|----|
| >hsa-miR-362-3p MIMAT0004683   | AACACACCUAUUCAAGGAUUA    | TTCGGAACACACCTATTCAAG   | GTGCAGGGTCCGAGGTCAGAGCCACCTGGGCAATTTTTTTTTTTGAATCC  | 30 |
| >hsa-miR-138-1-3p MIMAT0004607 | GCUACUUCACAACACACGGGCC   | CGGGTACTTCACAACACC      | GTGCAGGGTCCGAGGTCAGAGCCACCTGGGCAATTTTTTTTTTTGGCCCT  | 31 |
| >hsa-miR-532-3p MIMAT0004780   | CCUCCCACACCCAAGGCUUC     | TGCCTCCCACACCCAAGG      | GTGCAGGGTCCGAGGTCAGAGCCACCTGGGCAATTTTTTTTTTTGCAAGC  | 31 |
| >hsa-miR-3191-3p MIMAT0015075  | UGGGGACGUAGCUGGCCAGACG   | TTGGGGACGTAGCTGGCC      | GTGCAGGGTCCGAGGTCAGAGCCACCTGGGCAATTTTTTTTTTCTGTCT   | 31 |
| >hsa-miR-613 MIMAT0003281      | AGGAAUGUUCUUCUUUGCC      | TGTCGGAGGAATGTTCCCTC    | GTGCAGGGTCCGAGGTCAGAGCCACCTGGGCAATTTTTTTTTTTGGCAA   | 31 |
| >hsa-miR-376c-3p MIMAT0000720  | AACAUAGAGGAAAUUCCACGU    | GGTCGGAACATAGAGGAAATT   | GTGCAGGGTCCGAGGTCAGAGCCACCTGGGCAATTTTTTTTTTTACGTGG  | 31 |
| >hsa-miR-188-5p MIMAT0000457   | CAUCCCUUGCAUGGUGGAGGG    | TCGGCATCCCTTGCATGGT     | GTGCAGGGTCCGAGGTCAGAGCCACCTGGGCAATTTTTTTTTTTCCCTCC  | 31 |
| >hsa-miR-320a MIMAT0000510     | AAAAGCUGGGUUGAGAGGGCGA   | TCGGAAAAGCTGGGTTGAGA    | GTGCAGGGTCCGAGGTCAGAGCCACCTGGGCAATTTTTTTTTTTCCGCCCT | 31 |
| >hsa-miR-631 MIMAT0003300      | AGACCUGGCCCAGACCUCAGC    | TGGAGACCTGGCCAGAC       | GTGCAGGGTCCGAGGTCAGAGCCACCTGGGCAATTTTTTTTTTTGTCTGAG | 32 |
| >hsa-miR-151a-3p MIMAT0000757  | CUAGACUGAAGCUCCUUGAGG    | TCGGCTAGACTGAAGCTCC     | GTGCAGGGTCCGAGGTCAGAGCCACCTGGGCAATTTTTTTTTTTCTCAA   | 32 |
| >hsa-miR-371a-3p MIMAT0000723  | AAGUGCCGCCAUCUUUUGAGUGU  | TGGAAGTGCCGCCATCTTTT    | GTGCAGGGTCCGAGGTCAGAGCCACCTGGGCAATTTTTTTTTTTACTCT   | 32 |
| >hsa-miR-3923 MIMAT0018198     | AACUAGUAAUGUUGGAUUAGGG   | GTCGGAAGTGTAAATGTTGGA   | GTGCAGGGTCCGAGGTCAGAGCCACCTGGGCAATTTTTTTTTTTCCCTAA  | 32 |
| >hsa-miR-616-3p MIMAT0004805   | AGUCAUUGGAGGGUUUGAGCAG   | TCGGAGTCAATTGGAGGGTTT   | GTGCAGGGTCCGAGGTCAGAGCCACCTGGGCAATTTTTTTTTTTCTGTCT  | 32 |
| >hsa-miR-1208 MIMAT0005873     | UCACUGUUCAGACAGGCCGA     | TGTCGGTCACTGTTCAGACA    | GTGCAGGGTCCGAGGTCAGAGCCACCTGGGCAATTTTTTTTTTTCCGCCT  | 32 |
| >hsa-miR-22-5p MIMAT0004495    | AGUUCUUCAGUGGCAAGCUUUA   | TCGGAGTCTTCAGTGGCAA     | GTGCAGGGTCCGAGGTCAGAGCCACCTGGGCAATTTTTTTTTTTAAAGCT  | 32 |
| >hsa-miR-664a-3p MIMAT0005949  | UAUUCAUUUUAUCCCCAGCCUACA | TCGGTATTCATTTATCCCCAG   | GTGCAGGGTCCGAGGTCAGAGCCACCTGGGCAATTTTTTTTTTTGTAGGC  | 33 |
| >hsa-miR-483-5p MIMAT0004761   | AAGACGGGAGGAAAGAAGGGAG   | CGGAAAGACGGGAGGAAAGA    | GTGCAGGGTCCGAGGTCAGAGCCACCTGGGCAATTTTTTTTTTTCTCCCT  | 33 |
| >hsa-miR-135a-5p MIMAT0000428  | UAUGGCUUUUUUAUCCUAUGUGA  | TTCGGTATGGCTTTTTATTCCCT | GTGCAGGGTCCGAGGTCAGAGCCACCTGGGCAATTTTTTTTTTTACATA   | 33 |
| >hsa-miR-369-3p MIMAT0000721   | AAUAAUACAUGGUUGAUUUU     | GGTCGGAATAATACATGGTTG   | GTGCAGGGTCCGAGGTCAGAGCCACCTGGGCAATTTTTTTTTTTAAAGAT  | 33 |
| >hsa-miR-497-5p MIMAT0002820   | CAGCAGCACACUGUGGUUUUGU   | CGGCAGCAGCACACTGTG      | GTGCAGGGTCCGAGGTCAGAGCCACCTGGGCAATTTTTTTTTTTACAAAC  | 33 |
| >hsa-miR-18a-3p MIMAT0002891   | ACUGCCCUAAGUGCUCCUUCUGG  | TGACTGCCCTAAGTGCTCC     | GTGCAGGGTCCGAGGTCAGAGCCACCTGGGCAATTTTTTTTTTTCCAGAA  | 33 |
| >hsa-miR-1260b MIMAT0015041    | AUCCCAACCACUGCCACCAU     | GTCGGATCCCACCACTGC      | GTGCAGGGTCCGAGGTCAGAGCCACCTGGGCAATTTTTTTTTTTATGGTG  | 33 |
| >hsa-miR-150-5p MIMAT0000451   | UCUCCAAACCCUUGUACCAGUG   | CGGTCTCCCAACCCTTGTA     | GTGCAGGGTCCGAGGTCAGAGCCACCTGGGCAATTTTTTTTTTTACTGG   | 34 |
| >hsa-miR-381-3p MIMAT0000736   | UAUCAAGGGCAAGUCUCUCUGU   | TCGGTATACAAGGGCAAGCT    | GTGCAGGGTCCGAGGTCAGAGCCACCTGGGCAATTTTTTTTTTTTACAGAG | 34 |
| >hsa-miR-133b MIMAT0000770     | UUUGGUCCCCUUAACCAGCUA    | CGGTTTGGTCCCCTTCAAC     | GTGCAGGGTCCGAGGTCAGAGCCACCTGGGCAATTTTTTTTTTTTAGCTGG | 34 |
| >hsa-miR-15a-3p MIMAT0004488   | CAGGCCAUUUGUGCUGCCUCA    | CGGCAGGCCATATTGTGCT     | GTGCAGGGTCCGAGGTCAGAGCCACCTGGGCAATTTTTTTTTTTGAGGCA  | 34 |
| >hsa-miR-26b-5p MIMAT0000083   | UUCAAGUAAUUCAGGAUAGGU    | TGTCGGTTCAAGTAATTCAGG   | GTGCAGGGTCCGAGGTCAGAGCCACCTGGGCAATTTTTTTTTTTTACCTAT | 34 |
| >hsa-miR-596 MIMAT0003264      | AAGCCUGCCCAGCCUCCUGGG    | GGAAAGCTGCCCGGCTC       | GTGCAGGGTCCGAGGTCAGAGCCACCTGGGCAATTTTTTTTTTTCCCGAG  | 34 |
| >hsa-miR-1203 MIMAT0005866     | CCCAGGCCAGGAUGCAGCUC     | GGCCCGAGCCAGGATG        | GTGCAGGGTCCGAGGTCAGAGCCACCTGGGCAATTTTTTTTTTTGAGCTG  | 34 |
| >hsa-miR-135b-5p MIMAT0000758  | UAUGGCUUUUCAUCCUAUGUGA   | TCGGTATGGCTTTTTCATTCT   | GTGCAGGGTCCGAGGTCAGAGCCACCTGGGCAATTTTTTTTTTTTACATA  | 35 |
| >hsa-miR-181a-5p MIMAT0000256  | AACAUUCAACGCUGUCGGUGAGU  | TGGAACATTCAACGCTGTGCG   | GTGCAGGGTCCGAGGTCAGAGCCACCTGGGCAATTTTTTTTTTTACTCAC  | 35 |
| >hsa-miR-340-5p MIMAT0004692   | UUUAAAGCAAUGAGACUGAUU    | TGTCGGTTATAAAGCAATGAGA  | GTGCAGGGTCCGAGGTCAGAGCCACCTGGGCAATTTTTTTTTTTAATCAG  | 35 |
| >hsa-miR-337-5p MIMAT0004695   | GAACGGCUUCAUACAGGAGUU    | TTCGGGAACGGCTTCATACA    | GTGCAGGGTCCGAGGTCAGAGCCACCTGGGCAATTTTTTTTTTTAATCCT  | 35 |
| >hsa-miR-2355-5p MIMAT0016895  | AUCCCAAGAUACAUGGACAA     | GTCGGATCCCAGATACAAT     | GTGCAGGGTCCGAGGTCAGAGCCACCTGGGCAATTTTTTTTTTTGTCCAT  | 35 |
| >hsa-miR-1205 MIMAT0005869     | UCUGCAGGGUUUGCUUUGAG     | TTCGGTCTGCAGGGTTTGC     | GTGCAGGGTCCGAGGTCAGAGCCACCTGGGCAATTTTTTTTTTTCTCAA   | 35 |
| >hsa-miR-140-5p MIMAT0000431   | CAGUGGUUUUACCCUAUGGUAG   | TCGGCAGTGGTTTTACCCTA    | GTGCAGGGTCCGAGGTCAGAGCCACCTGGGCAATTTTTTTTTTTCTACCA  | 35 |
| >hsa-miR-455-3p MIMAT0004784   | GCAGUCCAUGGGCAUUAACAC    | CGGGCAGTCCATGGGCAT      | GTGCAGGGTCCGAGGTCAGAGCCACCTGGGCAATTTTTTTTTTTGTGTAT  | 36 |
| >hsa-let-7g-3p MIMAT0004584    | CUGUACAGGCCACUGCCUUGC    | CGGCTGTACAGGCCACTG      | GTGCAGGGTCCGAGGTCAGAGCCACCTGGGCAATTTTTTTTTTTGCAAGG  | 36 |
| >hsa-miR-147a MIMAT0000251     | GUGUGUGGAAAUGCUUCUGC     | GTCGGGTGTGTGAAATGC      | GTGCAGGGTCCGAGGTCAGAGCCACCTGGGCAATTTTTTTTTTTGCAGAA  | 36 |
| >hsa-miR-338-3p MIMAT0000763   | UCCAGCAUCAGUGAUUUUGUUG   | TCGGTCCAGCATCAGTGATT    | GTGCAGGGTCCGAGGTCAGAGCCACCTGGGCAATTTTTTTTTTTCACAA   | 36 |
| >hsa-miR-200a-3p MIMAT0000682  | UAACACUGUCUGGUAACGAUGU   | TTCGGTAACACTGTCTGGTAA   | GTGCAGGGTCCGAGGTCAGAGCCACCTGGGCAATTTTTTTTTTTACATCG  | 36 |
| >hsa-miR-1301-3p MIMAT0005797  | UUGCAGCUGCCUGGGAGUGACUUC | TTTGCAGCTGCCTGGGAGT     | GTGCAGGGTCCGAGGTCAGAGCCACCTGGGCAATTTTTTTTTTTGAAGTC  | 36 |
| >hsa-miR-15b-5p MIMAT0000417   | UAGCAGCACAUCAUGGUUACA    | CGGTAGCAGCACATCATGG     | GTGCAGGGTCCGAGGTCAGAGCCACCTGGGCAATTTTTTTTTTTGTAAC   | 36 |

|                                 |                         |                         |                                                    |    |
|---------------------------------|-------------------------|-------------------------|----------------------------------------------------|----|
| >hsa-miR-342-5p MIMAT0004694    | AGGGGUGCUAUCUGUGAUUGA   | TCGGAGGGGTGCTATCTGT     | GTGCAGGGTCCGAGGTCAGAGCCACCTGGGCAATTTTTTTTTTCAATCA  | 37 |
| >hsa-miR-98-5p MIMAT0000096     | UGAGGUAGUAAGUUGUAUUGUU  | TTCCGGTGAGGTAGTAAGTTGT  | GTGCAGGGTCCGAGGTCAGAGCCACCTGGGCAATTTTTTTTTTAAACAA  | 37 |
| >hsa-miR-30c-5p MIMAT0000244    | UGUAAAACAUCUACACUCUCAGC | TCGGTGTA AACATCCTACACT  | GTGCAGGGTCCGAGGTCAGAGCCACCTGGGCAATTTTTTTTTTGCTGAG  | 37 |
| >hsa-miR-4516 MIMAT0019053      | GGGAGAAGGGUCGGGGC       | TGGTCGGGGGAGAAGGGT      | GTGCAGGGTCCGAGGTCAGAGCCACCTGGGCAATTTTTTTTTTGCCCCG  | 37 |
| >hsa-miR-22-3p MIMAT0000077     | AAGCUGCCAGUUGAAGAACUGU  | CGGAAGCTGCCAGTTGAAG     | GTGCAGGGTCCGAGGTCAGAGCCACCTGGGCAATTTTTTTTTTACAGTT  | 37 |
| >hsa-miR-103a-2-5p MIMAT0009196 | AGCUUCUUUACAGUGCUGCCUUG | CGGAGCTTCTTACAGTGCT     | GTGCAGGGTCCGAGGTCAGAGCCACCTGGGCAATTTTTTTTTTCAAGGC  | 37 |
| >hsa-miR-636 MIMAT0003306       | UGUGCUUGCUCGUCCCGCCCGCA | GTGTGCTTGCTCGTCCCG      | GTGCAGGGTCCGAGGTCAGAGCCACCTGGGCAATTTTTTTTTTGCGGGC  | 37 |
| >hsa-miR-186-5p MIMAT0000456    | CAAAGAAUUCUCCUUUUGGGCU  | GTCCGCAAAGAATTCTCCTTT   | GTGCAGGGTCCGAGGTCAGAGCCACCTGGGCAATTTTTTTTTTAGCCCA  | 38 |
| >hsa-miR-127-5p MIMAT0004604    | CUGAAGCUCAGAGGGCUCUGAU  | GGCTGAAGCTCAGAGGGC      | GTGCAGGGTCCGAGGTCAGAGCCACCTGGGCAATTTTTTTTTTATCAGA  | 38 |
| >hsa-miR-197-3p MIMAT0000227    | UUCACCACCUUCUCCACCCAGC  | CGGTTACCACCTTCTCCA      | GTGCAGGGTCCGAGGTCAGAGCCACCTGGGCAATTTTTTTTTTGCTGGG  | 38 |
| >hsa-miR-203a-3p MIMAT0000264   | GUGAAAUGUUUAGGACCACUAG  | TTCCGGTGAAATGTTTAGGAC   | GTGCAGGGTCCGAGGTCAGAGCCACCTGGGCAATTTTTTTTTTCTAGTG  | 38 |
| >hsa-miR-30e-3p MIMAT0000693    | CUUUCAGUCGGAUGUUUACAGC  | TCGGCTTTCAGTCGGATGTT    | GTGCAGGGTCCGAGGTCAGAGCCACCTGGGCAATTTTTTTTTTGCTGTA  | 38 |
| >hsa-miR-17-3p MIMAT0000071     | ACUCGAGUGAAGGCACUUGUAG  | TGGACTGCAGTGAAGGCAC     | GTGCAGGGTCCGAGGTCAGAGCCACCTGGGCAATTTTTTTTTTCTACAA  | 38 |
| >hsa-miR-409-3p MIMAT0001639    | GAAUGUUGCUCGGUGAACCCCU  | CGGAATGTTGCTCGGTGA      | GTGCAGGGTCCGAGGTCAGAGCCACCTGGGCAATTTTTTTTTTAGGGGT  | 38 |
| >hsa-miR-139-5p MIMAT0000250    | UCUACAGUGCACGUGUCUCCAGU | GGTCTACAGTGCACGTGTC     | GTGCAGGGTCCGAGGTCAGAGCCACCTGGGCAATTTTTTTTTTACTGGA  | 39 |
| >hsa-miR-299-3p MIMAT0000687    | UAUGUGGGAUGGUAACCCGUU   | TTCCGGTATGTGGGATGGTAAA  | GTGCAGGGTCCGAGGTCAGAGCCACCTGGGCAATTTTTTTTTTAAAGCGG | 39 |
| >hsa-miR-509-5p MIMAT0004779    | UACUGCAGACAGUGGCAAUCA   | TCGGTACTGCAGACAGTGG     | GTGCAGGGTCCGAGGTCAGAGCCACCTGGGCAATTTTTTTTTTGATTGC  | 39 |
| >hsa-miR-320b MIMAT0005792      | AAAAGCUGGGUUGAGAGGGCAA  | TCGGAAAAGCTGGGTTGAGA    | GTGCAGGGTCCGAGGTCAGAGCCACCTGGGCAATTTTTTTTTTGCCCTC  | 39 |
| >hsa-miR-425-5p MIMAT0003393    | AAUGACACGAUCACUCCGUUGA  | TGGAATGACACGATCACTCC    | GTGCAGGGTCCGAGGTCAGAGCCACCTGGGCAATTTTTTTTTTCAACGG  | 39 |
| >hsa-miR-96-5p MIMAT0000095     | UUUGGCACUAGCACAUUUUUGCU | CGGTTTGGCACTAGCACATT    | GTGCAGGGTCCGAGGTCAGAGCCACCTGGGCAATTTTTTTTTTAGCAA   | 39 |
| >hsa-miR-124-3p MIMAT0000422    | UAAGGCACGCGGUGAAUGCC    | TCGGTAAGGCACGCGGTG      | GTGCAGGGTCCGAGGTCAGAGCCACCTGGGCAATTTTTTTTTTGCCATT  | 39 |
| >hsa-miR-136-5p MIMAT0000448    | ACUCCAUUUGUUUGAUGAUGGA  | TTCCGGACTCCATTTGTTTTGAT | GTGCAGGGTCCGAGGTCAGAGCCACCTGGGCAATTTTTTTTTTCCATCA  | 40 |
| >hsa-miR-146b-5p MIMAT0002809   | UGAGAUCUGAAUCCUAAGGCU   | TTCCGGTGAGAAGTGAATCCA   | GTGCAGGGTCCGAGGTCAGAGCCACCTGGGCAATTTTTTTTTTAGCCTA  | 40 |
| >hsa-miR-4770 MIMAT0019924      | UGAGAUGACACUGUAGCU      | CGGTCCGGTGAGATGACACT    | GTGCAGGGTCCGAGGTCAGAGCCACCTGGGCAATTTTTTTTTTAGCTAC  | 40 |
| >hsa-miR-590-3p MIMAT0004801    | UAAUUUUUAUGUAUAAGCUAGU  | TCGGTCCGTAATTTTATGTATAA | GTGCAGGGTCCGAGGTCAGAGCCACCTGGGCAATTTTTTTTTTACTAGC  | 40 |
| >hsa-miR-324-5p MIMAT0000761    | CGCAUCCCCUAGGGCAUUGGUGU | GCGCATCCCCTAGGGCAT      | GTGCAGGGTCCGAGGTCAGAGCCACCTGGGCAATTTTTTTTTTACACCA  | 40 |
| >hsa-miR-30c-2-3p MIMAT0004550  | CUGGGAGAAGGCUGUUUACUCU  | TGGCTGGGAGAAGGCTGTT     | GTGCAGGGTCCGAGGTCAGAGCCACCTGGGCAATTTTTTTTTTAGAGTA  | 40 |
| >hsa-miR-181c-3p MIMAT0004559   | AACCAUCGACCGUUGAGUGGAC  | CGGAACCATCGACCGTTGA     | GTGCAGGGTCCGAGGTCAGAGCCACCTGGGCAATTTTTTTTTTGTCAC   | 40 |
| >hsa-miR-16-2-3p MIMAT0004518   | CCAAUUAUACUGUGCUGCUUUA  | TTCCGGCCAATATTACTGTGCT  | GTGCAGGGTCCGAGGTCAGAGCCACCTGGGCAATTTTTTTTTTAAAGCA  | 41 |
| >hsa-miR-130b-3p MIMAT0000691   | CAGUGCAAUGAUGAAAGGGCAU  | TTCCGGCAGTGCAATGATGAAA  | GTGCAGGGTCCGAGGTCAGAGCCACCTGGGCAATTTTTTTTTTATGCC   | 41 |
| >hsa-miR-215-5p MIMAT0000272    | AUGACCUAUGAAUUGACAGAC   | TGTCGGATGACCTATGAATTG   | GTGCAGGGTCCGAGGTCAGAGCCACCTGGGCAATTTTTTTTTTGCTGT   | 41 |
| >hsa-miR-766-3p MIMAT0003888    | ACUCCAGCCCCACAGCCUCAGC  | TGACTCCAGCCCCACAGC      | GTGCAGGGTCCGAGGTCAGAGCCACCTGGGCAATTTTTTTTTTGCTGAG  | 41 |
| >hsa-miR-141-3p MIMAT0000432    | UAACACUGUCUGUAAAGAUGG   | TTCCGGTAACACTGTCTGGTAA  | GTGCAGGGTCCGAGGTCAGAGCCACCTGGGCAATTTTTTTTTTCCATCT  | 41 |
| >hsa-miR-33a-5p MIMAT0000091    | GUGCAUUGUAGUUGCAUUGCA   | TTCCGGGTGCATTGTAGTTGC   | GTGCAGGGTCCGAGGTCAGAGCCACCTGGGCAATTTTTTTTTTGCAATG  | 41 |
| >hsa-miR-1-3p MIMAT0000416      | UGGAAUGUAAAAGAAGUAUGUAU | GTCGGTGGAATGTAAGAAGT    | GTGCAGGGTCCGAGGTCAGAGCCACCTGGGCAATTTTTTTTTTATACAT  | 41 |
| >hsa-miR-30d-3p MIMAT0004551    | CUUUCAGUCAGAUGUUUGCUGC  | TTCCGGCTTTCAGTCAGATGTT  | GTGCAGGGTCCGAGGTCAGAGCCACCTGGGCAATTTTTTTTTTGCAGCA  | 42 |
| >hsa-miR-191-5p MIMAT0000440    | CAACGGAAUCCAAAAGCAGCUG  | TGGCAACGGAATCCAAAAG     | GTGCAGGGTCCGAGGTCAGAGCCACCTGGGCAATTTTTTTTTTTCAGCTG | 42 |
| >hsa-miR-129-5p MIMAT0000242    | CUUUUUGCGGUCUGGGCUUGC   | TCGGCTTTTTGCGGTCTGG     | GTGCAGGGTCCGAGGTCAGAGCCACCTGGGCAATTTTTTTTTTGC AAGC | 42 |
| >hsa-miR-4538 MIMAT0019081      | GAGCUUGGAUGAGCUGGGCUGA  | TGGGAGCTTGATGAGCTG      | GTGCAGGGTCCGAGGTCAGAGCCACCTGGGCAATTTTTTTTTTTCAGCCC | 42 |
| >hsa-miR-29a-3p MIMAT0000086    | UAGCACCAUCUGAAAUCGGUUA  | TTCCGGTAGCACCATCTGAAAT  | GTGCAGGGTCCGAGGTCAGAGCCACCTGGGCAATTTTTTTTTTAAACCGA | 42 |
| >hsa-miR-942-5p MIMAT0004985    | UCUUCUCUGUUUUGGCCAUGUG  | TCGGTCTTCTGTGTTTGGC     | GTGCAGGGTCCGAGGTCAGAGCCACCTGGGCAATTTTTTTTTTTCACATG | 42 |
| >hsa-miR-93-5p MIMAT0000093     | CAAAGUGCUGUUCGUGCAGGUAG | GGCAAAGTGCTGTTCTGTC     | GTGCAGGGTCCGAGGTCAGAGCCACCTGGGCAATTTTTTTTTTCTACCT  | 42 |
| >hsa-miR-342-3p MIMAT0000753    | UCUCACACAGAAAUCGCACCCGU | TGGTCTCACAGAAATCGC      | GTGCAGGGTCCGAGGTCAGAGCCACCTGGGCAATTTTTTTTTTACGGGT  | 43 |

|                                 |                          |                        |                                                     |    |
|---------------------------------|--------------------------|------------------------|-----------------------------------------------------|----|
| >hsa-miR-487b-3p MIMAT0003180   | AAUCGUACAGGGUCAUCCACUU   | TCGGAATCGTACAGGGTCAT   | GTGCAGGGTCCGAGGTCAGAGCCACCTGGGCAATTTTTTTTTTTAAGTGG  | 43 |
| >hsa-miR-122-5p MIMAT0000421    | UGGAGUGUGACAAUGGUGUUUG   | CGGTGGAGTGTGACAATGG    | GTGCAGGGTCCGAGGTCAGAGCCACCTGGGCAATTTTTTTTTTCAAACA   | 43 |
| >hsa-miR-301a-3p MIMAT0000688   | CAGUGCAAUAGUUAUGUCAAAAGC | TCGGCAGTGCAATAGTATTGT  | GTGCAGGGTCCGAGGTCAGAGCCACCTGGGCAATTTTTTTTTTGTCTTTG  | 43 |
| >hsa-miR-4524a-3p MIMAT0019063  | UGAGACAGGCUUAUGCUGCUAU   | CGGTGAGACAGGCTTATGC    | GTGCAGGGTCCGAGGTCAGAGCCACCTGGGCAATTTTTTTTTTATAGCA   | 43 |
| >hsa-miR-320e MIMAT0015072      | AAAGCUGGGUUGAGAAGG       | TGGTCGGAAAGCTGGGTTG    | GTGCAGGGTCCGAGGTCAGAGCCACCTGGGCAATTTTTTTTTTCCCTTCT  | 43 |
| >hsa-miR-26a-5p MIMAT0000082    | UUCAAGUAAUCCAGGAUAGGCU   | TTCGGTTCAAGTAATCCAGGA  | GTGCAGGGTCCGAGGTCAGAGCCACCTGGGCAATTTTTTTTTTATAGCTA  | 43 |
| >hsa-miR-492 MIMAT0002812       | AGGACCUGCGGGACAAGAUUCUU  | GAGGACCTGCGGGACAAG     | GTGCAGGGTCCGAGGTCAGAGCCACCTGGGCAATTTTTTTTTTAAAGAA   | 44 |
| >hsa-let-7f-1-3p MIMAT0004486   | CUAUACAAUCUAUUGCCUUC     | GTCGGCTATAACAATCTATTGC | GTGCAGGGTCCGAGGTCAGAGCCACCTGGGCAATTTTTTTTTTGGGAAG   | 44 |
| >hsa-miR-200c-3p MIMAT0000617   | UAAUACUGCCGGUAAUGAUGGA   | CGGTAATACTGCCGGTAAT    | GTGCAGGGTCCGAGGTCAGAGCCACCTGGGCAATTTTTTTTTTCCATCA   | 44 |
| >hsa-miR-378h MIMAT0018984      | ACUGGACUUGGUGUCAGAUGG    | TCGGACTGGACTTGGTGT     | GTGCAGGGTCCGAGGTCAGAGCCACCTGGGCAATTTTTTTTTTCCATCT   | 44 |
| >hsa-miR-885-5p MIMAT0004947    | UCCAUAACACUACCCUGCCUCU   | TCGGTCCATTACACTACCCT   | GTGCAGGGTCCGAGGTCAGAGCCACCTGGGCAATTTTTTTTTTATAGAGG  | 44 |
| >hsa-miR-153-3p MIMAT0000439    | UUGCAUAGUCACAAAAGUGAUC   | GTCGGTTGCATAGTCACAAAA  | GTGCAGGGTCCGAGGTCAGAGCCACCTGGGCAATTTTTTTTTTTGATCAC  | 44 |
| >hsa-miR-3655 MIMAT0018075      | GCUUGUCGUCGCGGUGUUGCU    | TGGGCTTGTGCTGCGGT      | GTGCAGGGTCCGAGGTCAGAGCCACCTGGGCAATTTTTTTTTTATAGCAAC | 44 |
| >hsa-miR-134-5p MIMAT0000447    | UGUGACUGGUUGACCAGAGGGG   | CGGTGTGACTGGTTGACCA    | GTGCAGGGTCCGAGGTCAGAGCCACCTGGGCAATTTTTTTTTTCCCTC    | 45 |
| >hsa-let-7e-5p MIMAT0000066     | UGAGGUAGGAGGUUGUAUAGUU   | CGGTGAGGTAGGAGTTGT     | GTGCAGGGTCCGAGGTCAGAGCCACCTGGGCAATTTTTTTTTTAACTAT   | 45 |
| >hsa-miR-145-5p MIMAT0000437    | GUCCAGUUUCCAGGAAUCCCU    | GGGTCCAGTTTTCCAGGA     | GTGCAGGGTCCGAGGTCAGAGCCACCTGGGCAATTTTTTTTTTATAGGAT  | 45 |
| >hsa-miR-331-3p MIMAT0000760    | GCCCCUGGGCCUAUCCUAGAA    | GGGCCCTGGGCCTATC       | GTGCAGGGTCCGAGGTCAGAGCCACCTGGGCAATTTTTTTTTTCTAGGA   | 45 |
| >hsa-miR-196b-5p MIMAT0001080   | UAGGUAGUUUCCUGUUGUUGGG   | TTCGGTAGGTAGTTTCTGT    | GTGCAGGGTCCGAGGTCAGAGCCACCTGGGCAATTTTTTTTTTCCCAAC   | 45 |
| >hsa-miR-23a-3p MIMAT0000078    | AUCACAUUGCCAGGGAUUUC     | TCGGATCACATTGCCAGGG    | GTGCAGGGTCCGAGGTCAGAGCCACCTGGGCAATTTTTTTTTTGGAAAT   | 45 |
| >hsa-miR-125b-1-3p MIMAT0004592 | ACGGGUUAGGCUCUUGGGAGCU   | TGGACGGGTTAGGCTCTTG    | GTGCAGGGTCCGAGGTCAGAGCCACCTGGGCAATTTTTTTTTTATAGCTCC | 45 |
| >hsa-miR-147b MIMAT0004928      | GUGUGCGGAAUAGCUUCUGCUA   | CGGGTGTGCGGAAATGCTT    | GTGCAGGGTCCGAGGTCAGAGCCACCTGGGCAATTTTTTTTTTATAGCAGA | 46 |
| >hsa-miR-27a-5p MIMAT0004501    | AGGGCUUAGCUGUCUGUGAGCA   | TGGAGGGCTTAGCTGCTTG    | GTGCAGGGTCCGAGGTCAGAGCCACCTGGGCAATTTTTTTTTTGTCTCAC  | 46 |
| >hsa-miR-3131 MIMAT0014996      | UCGAGGACUGGUGAAGGGCCUU   | TGTCGAGGACTGGTGAAG     | GTGCAGGGTCCGAGGTCAGAGCCACCTGGGCAATTTTTTTTTTAAAGGCC  | 46 |
| >hsa-miR-133a-3p MIMAT0000427   | UUUGUCCCCUUAACACGUCUG    | CGGTTTGGTCCCCTCAAC     | GTGCAGGGTCCGAGGTCAGAGCCACCTGGGCAATTTTTTTTTTTCAGCTG  | 46 |
| >hsa-miR-3907 MIMAT0018179      | AGGUGCUCCAGGCUGGCUCACA   | TGAGGTGCTCCAGGCTGG     | GTGCAGGGTCCGAGGTCAGAGCCACCTGGGCAATTTTTTTTTTGTGAGC   | 46 |
| >hsa-miR-484 MIMAT0002174       | UCAGGCUCAGUCCCCUCCGAU    | GGTCAGGCTCAGTCCCCT     | GTGCAGGGTCCGAGGTCAGAGCCACCTGGGCAATTTTTTTTTTATCGGG   | 46 |
| >hsa-miR-3129-5p MIMAT0014992   | GCAGUAGUGUAGAGAUUGGUUU   | TCGGGCAGTAGTGTAGAGAT   | GTGCAGGGTCCGAGGTCAGAGCCACCTGGGCAATTTTTTTTTTAAACCA   | 46 |
| >hsa-miR-144-3p MIMAT0000436    | UACAGUAUAGAUGAUGUACU     | TGGTCGGTACAGTATAGATGA  | GTGCAGGGTCCGAGGTCAGAGCCACCTGGGCAATTTTTTTTTTATAGTACA | 47 |
| >hsa-miR-520e MIMAT0002825      | AAAGUGCUUCCUUUUUGAGGG    | TGTCGGAAAGTGCTTCTTTT   | GTGCAGGGTCCGAGGTCAGAGCCACCTGGGCAATTTTTTTTTTCCCTCA   | 47 |
| >hsa-miR-210-3p MIMAT0000267    | CUGUGCGUGUGACAGCGGCUGA   | GGCTGTGCGTGTGACAGC     | GTGCAGGGTCCGAGGTCAGAGCCACCTGGGCAATTTTTTTTTTTCAGCCG  | 47 |
| >hsa-miR-494-3p MIMAT0002816    | UGAAACAUAACACGGGAAACCUC  | TCGGTGAAACATAACCGGGA   | GTGCAGGGTCCGAGGTCAGAGCCACCTGGGCAATTTTTTTTTTGTAGGTT  | 47 |
| >hsa-miR-2110 MIMAT0010133      | UUGGGGAAACGGCCGCUGAGUG   | TGTTGGGGAAACGGCCGC     | GTGCAGGGTCCGAGGTCAGAGCCACCTGGGCAATTTTTTTTTTCACTCA   | 47 |
| >hsa-miR-1207-3p MIMAT0005872   | UCAGCUGGCCCUCAUUUC       | TGTCGGTACAGTGGCCCT     | GTGCAGGGTCCGAGGTCAGAGCCACCTGGGCAATTTTTTTTTTGTAAATG  | 47 |
| >hsa-let-7a-3p MIMAT0004481     | CUAUACAAUCUACUGUCUUUC    | TGTCGGCTATAACAATCTACTG | GTGCAGGGTCCGAGGTCAGAGCCACCTGGGCAATTTTTTTTTTGTAAAGA  | 47 |
| >hsa-miR-31-5p MIMAT0000089     | AGGCAAGAUGCUGGCAUAGCU    | CGGAGGCAAGATGCTGGC     | GTGCAGGGTCCGAGGTCAGAGCCACCTGGGCAATTTTTTTTTTATAGCTAT | 48 |
| >hsa-miR-522-3p MIMAT0002868    | AAAUGGUUCCUUUUAGAGUGU    | GTCGGAAAATGGTTCCCTTTA  | GTGCAGGGTCCGAGGTCAGAGCCACCTGGGCAATTTTTTTTTTACTCTC   | 48 |
| >hsa-miR-188-3p MIMAT0004613    | CUCCACAUGCAGGGUUUGCA     | TGGCTCCCACATGCAGGG     | GTGCAGGGTCCGAGGTCAGAGCCACCTGGGCAATTTTTTTTTTGTCAAAC  | 48 |
| >hsa-miR-425-3p MIMAT0001343    | AUCGGGAAUGUCGUGUCCGCC    | CGGATCGGGAATGTCGTGT    | GTGCAGGGTCCGAGGTCAGAGCCACCTGGGCAATTTTTTTTTTGGGCGG   | 48 |
| >hsa-miR-449a MIMAT0001541      | UGGACAGUGUAUUGUAGCUGGU   | TTCGGTGGCAGTGTATTGTTA  | GTGCAGGGTCCGAGGTCAGAGCCACCTGGGCAATTTTTTTTTTACCAGC   | 48 |
| >hsa-miR-1204 MIMAT0005868      | UCGUGGCCUGGUCUCCAUAU     | TGGTCGTGGCCTGGTCTC     | GTGCAGGGTCCGAGGTCAGAGCCACCTGGGCAATTTTTTTTTTATAATG   | 48 |
| >hsa-miR-137 MIMAT0000429       | UUAUUGCUUAAAGAAUACGCUAG  | GTCGGTATTGCTTAAGAATAC  | GTGCAGGGTCCGAGGTCAGAGCCACCTGGGCAATTTTTTTTTTCTACGC   | 48 |
| >hsa-miR-3911 MIMAT0018185      | UGUGUGGAUCCUGGAGGAGGCA   | TGGTGTGTGGATCCTGGAG    | GTGCAGGGTCCGAGGTCAGAGCCACCTGGGCAATTTTTTTTTTGCCTCC   | 49 |
| >hsa-miR-487a-3p MIMAT0002178   | AAUCAUACAGGGACAUCCAGUU   | TTCGGAATCATACAGGGACAT  | GTGCAGGGTCCGAGGTCAGAGCCACCTGGGCAATTTTTTTTTTAACTGG   | 49 |



|                               |                          |                        |                                                    |    |
|-------------------------------|--------------------------|------------------------|----------------------------------------------------|----|
| >hsa-miR-3200-3p MIMAT0015085 | CACCUUGCGCUACUCAGGUCUG   | TGGCACCTTGCCTACTCA     | GTGCAGGGTCCGAGGTCAGAGCCACCTGGGCAATTTTTTTTTTTCAGACC | 49 |
| >hsa-miR-501-5p MIMAT0002872  | AAUCCUUUGUCCUGGGUGAGA    | CGGAATCCTTTGTCCCTGG    | GTGCAGGGTCCGAGGTCAGAGCCACCTGGGCAATTTTTTTTTTCTCACC  | 49 |
| >hsa-miR-183-3p MIMAT0004560  | GUGAAUUACCGAAGGGCCAUAA   | CGGGTGAATTACCGAAGGG    | GTGCAGGGTCCGAGGTCAGAGCCACCTGGGCAATTTTTTTTTTATGGCC  | 49 |
| >hsa-miR-194-5p MIMAT0000460  | UGUAAACAGCAACUCCAUGUGGA  | TCGGTGTAACAGCAACTCCA   | GTGCAGGGTCCGAGGTCAGAGCCACCTGGGCAATTTTTTTTTTCCACAT  | 49 |
| >hsa-miR-4267 MIMAT0016893    | UCCAGCUCGGUGGCAC         | CGGTCCGGTCCAGCTCGG     | GTGCAGGGTCCGAGGTCAGAGCCACCTGGGCAATTTTTTTTTTGTGCCA  | 49 |
| >hsa-miR-15b-3p MIMAT0004586  | CGAAUCAUUUUUGCUGUCUA     | GTCGGCGAATCATATTGCT    | GTGCAGGGTCCGAGGTCAGAGCCACCTGGGCAATTTTTTTTTTAGAGCA  | 50 |
| >hsa-miR-222-3p MIMAT0000279  | AGCUACAUCUGGCUACUGGGU    | TTCGGAGCTACATCTGGCTA   | GTGCAGGGTCCGAGGTCAGAGCCACCTGGGCAATTTTTTTTTTACCAG   | 50 |
| >hsa-miR-3610 MIMAT0017987    | GAAUCGGAAGGAGGCGCCG      | GTCGGGAATCGGAAAGGAG    | GTGCAGGGTCCGAGGTCAGAGCCACCTGGGCAATTTTTTTTTTCGGCGC  | 50 |
| >hsa-let-7i-5p MIMAT0000415   | UGAGGUAGUAGUUUGUCUGUU    | TTCGGTGAGGTAGTAGTTGT   | GTGCAGGGTCCGAGGTCAGAGCCACCTGGGCAATTTTTTTTTTAAACAGC | 50 |
| >hsa-miR-4732-5p MIMAT0019855 | UGUAGAGCAGGGAGCAGGAAGCU  | TGTGTAGAGCAGGGAGCAG    | GTGCAGGGTCCGAGGTCAGAGCCACCTGGGCAATTTTTTTTTTAGCTTC  | 50 |
| >hsa-miR-17-5p MIMAT0000070   | CAAAGUGCUCACAGUGCAGGUAG  | TGGCAAAGTGCTTACAGTGC   | GTGCAGGGTCCGAGGTCAGAGCCACCTGGGCAATTTTTTTTTTCTACCT  | 50 |
| >hsa-miR-378g MIMAT0018937    | ACUGGGCUUGGAGUCAGAAAG    | TTCGGACTGGGCTTGGAGT    | GTGCAGGGTCCGAGGTCAGAGCCACCTGGGCAATTTTTTTTTTCTCTCTG | 50 |
| >hsa-miR-324-3p MIMAT0000762  | ACUGCCCCAGGUGCUCUGG      | CGGACTGCCCCAGGTGC      | GTGCAGGGTCCGAGGTCAGAGCCACCTGGGCAATTTTTTTTTTCCAGCA  | 51 |
| >hsa-miR-4274 MIMAT0016906    | CAGCAGUCCCUCCCCUG        | TGTCGGCAGCAGTCCCTC     | GTGCAGGGTCCGAGGTCAGAGCCACCTGGGCAATTTTTTTTTTTCAGGGG | 51 |
| >hsa-miR-516a-5p MIMAT0004770 | UUCUCGAGGAAAGAAGCACUUC   | TGGTTCTCGAGGAAAGAAGC   | GTGCAGGGTCCGAGGTCAGAGCCACCTGGGCAATTTTTTTTTTGAAAGT  | 51 |
| >hsa-miR-605-5p MIMAT0003273  | UAAAUCCCAUGGUGCCUUCUCCU  | TGGTAAATCCCATGGTGCCT   | GTGCAGGGTCCGAGGTCAGAGCCACCTGGGCAATTTTTTTTTTAGGAGA  | 51 |
| >hsa-miR-432-5p MIMAT0002814  | UCUUGGAGUAGGUCAUUGGGUGG  | CGGTCTTGGAGTAGGTCATT   | GTGCAGGGTCCGAGGTCAGAGCCACCTGGGCAATTTTTTTTTTCCACCC  | 51 |
| >hsa-miR-4802-3p MIMAT0019982 | UACAUGGAUGGAAACCUUCAAGC  | CGGTACATGGATGGAAACCT   | GTGCAGGGTCCGAGGTCAGAGCCACCTGGGCAATTTTTTTTTTGTCTGA  | 51 |
| >hsa-miR-27b-3p MIMAT0000419  | UUCACAGUGGCUAAGUUCUGC    | TTCGGTTCACAGTGGCTAAG   | GTGCAGGGTCCGAGGTCAGAGCCACCTGGGCAATTTTTTTTTTGCAGAA  | 51 |
| >hsa-miR-5000-3p MIMAT0021020 | UCAGGACACUUCUGAACUUGGA   | TCGGTCAGGACACTTCTGAA   | GTGCAGGGTCCGAGGTCAGAGCCACCTGGGCAATTTTTTTTTTCCAAGT  | 52 |
| >hsa-miR-493-3p MIMAT0003161  | UGAAGGUCUACUGUGUGCCAGG   | TCGGTGAAGGTCTACTGTGT   | GTGCAGGGTCCGAGGTCAGAGCCACCTGGGCAATTTTTTTTTTCTGGC   | 52 |
| >hsa-let-7g-5p MIMAT0000414   | UGAGGUAGUAGUUUGUACAGUU   | TTCGGTGAGGTAGTAGTTGT   | GTGCAGGGTCCGAGGTCAGAGCCACCTGGGCAATTTTTTTTTTAACTGT  | 52 |
| >hsa-miR-412-3p MIMAT0002170  | ACUUCACCUUGGCCACUAGCCGU  | GGACTTCACTGGTCCACT     | GTGCAGGGTCCGAGGTCAGAGCCACCTGGGCAATTTTTTTTTTACGGCT  | 52 |
| >hsa-miR-1539 MIMAT0007401    | UCCUGCGCGUCCCAUGCCG      | GGTCTGCGCTCCCAG        | GTGCAGGGTCCGAGGTCAGAGCCACCTGGGCAATTTTTTTTTTGGGCAT  | 52 |
| >hsa-miR-3666 MIMAT0018088    | CAGUGCAAGUGUAGAUGCCGA    | TTCGGCAGTGCAAAGTGTAGA  | GTGCAGGGTCCGAGGTCAGAGCCACCTGGGCAATTTTTTTTTTTCGGCAT | 52 |
| >hsa-miR-192-5p MIMAT0000222  | CUGACCUAUGAAUUGACAGCC    | GTCGGCTGACCTATGAATTG   | GTGCAGGGTCCGAGGTCAGAGCCACCTGGGCAATTTTTTTTTTGGCTGT  | 52 |
| >hsa-miR-3613-3p MIMAT0017991 | ACAAAAAAAAAAGCCCAACCCUUC | TCGGACAAAAAAAAAAGCCCAA | GTGCAGGGTCCGAGGTCAGAGCCACCTGGGCAATTTTTTTTTTGAAGGG  | 53 |
| >hsa-miR-376a-3p MIMAT0000729 | AUCAUAGAGGAAAAUCCACGU    | GGTCGGATCATAGAGGAAAAT  | GTGCAGGGTCCGAGGTCAGAGCCACCTGGGCAATTTTTTTTTTACGTGG  | 53 |
| >hsa-miR-574-5p MIMAT0004795  | UGAGUGUGUGUGUGAGUGUGU    | TGGTGAGTGTGTGTGTGTA    | GTGCAGGGTCCGAGGTCAGAGCCACCTGGGCAATTTTTTTTTTACACAC  | 53 |
| >hsa-let-7i-3p MIMAT0004585   | CUGCGCAAGCUACUGCCUUGCU   | GGCTGCGCAAGCTACTGC     | GTGCAGGGTCCGAGGTCAGAGCCACCTGGGCAATTTTTTTTTTAGCAAG  | 53 |
| >hsa-miR-4422 MIMAT0018935    | AAAAGCAUCAGGAAGUACCCA    | GTCGAAAAGCATCAGGAAG    | GTGCAGGGTCCGAGGTCAGAGCCACCTGGGCAATTTTTTTTTTGGGTAC  | 53 |
| >hsa-miR-7-5p MIMAT0000252    | UGGAAGACUAGUGAUUUUGUUGU  | TCGGTGGAAGACTAGTGATTT  | GTGCAGGGTCCGAGGTCAGAGCCACCTGGGCAATTTTTTTTTTACAACA  | 53 |
| >hsa-miR-101-3p MIMAT0000099  | UACAGUACUGUGAUACUGAA     | TGTCGGTACAGTACTGTGATA  | GTGCAGGGTCCGAGGTCAGAGCCACCTGGGCAATTTTTTTTTTTCAGTTA | 53 |
| >hsa-miR-23b-3p MIMAT0000418  | AUCACAUUGCCAGGGAUUACC    | TCGGATCACATTGCCAGGG    | GTGCAGGGTCCGAGGTCAGAGCCACCTGGGCAATTTTTTTTTTGGTAAT  | 54 |
| >hsa-miR-223-3p MIMAT0000280  | UGUCAGUUUGUCAAAUACCCCA   | GTCGGTGTCAGTTTGTCAAAT  | GTGCAGGGTCCGAGGTCAGAGCCACCTGGGCAATTTTTTTTTTGGGGTA  | 54 |
| >hsa-miR-183-5p MIMAT0000261  | UAUGGCACUGGUAGAAUUCACU   | TCGGTATGGCACTGGTAGAA   | GTGCAGGGTCCGAGGTCAGAGCCACCTGGGCAATTTTTTTTTTAGTGAA  | 54 |
| >hsa-miR-1281 MIMAT0005939    | UCGCCUCCUCCUCUCCC        | GGTCGGTTCGCTCCTCC      | GTGCAGGGTCCGAGGTCAGAGCCACCTGGGCAATTTTTTTTTTGGGAGA  | 54 |
| >hsa-miR-574-3p MIMAT0003239  | CACGCUCAUGCACACACCCACA   | TGGCACGTCATGCACACA     | GTGCAGGGTCCGAGGTCAGAGCCACCTGGGCAATTTTTTTTTTGTGGGT  | 54 |
| >hsa-miR-30a-5p MIMAT0000087  | UGUAAAACAUCCUCGACUGGAAG  | TCGGTGTAACATCCTCGAC    | GTGCAGGGTCCGAGGTCAGAGCCACCTGGGCAATTTTTTTTTTCTTCCA  | 54 |
| >hsa-miR-191-3p MIMAT0001618  | GCUGCGCUUGGAUUUCGUCCCC   | TGGGCTGCGCTTGGATTTC    | GTGCAGGGTCCGAGGTCAGAGCCACCTGGGCAATTTTTTTTTTGGGGAC  | 54 |
| >hsa-miR-193a-3p MIMAT0000459 | AACUGGCCUACAAAGUCCAGU    | TCGGAACCTGGCTACAAAGT   | GTGCAGGGTCCGAGGTCAGAGCCACCTGGGCAATTTTTTTTTTACTGGG  | 55 |
| >hsa-miR-576-5p MIMAT0003241  | AUUCUAAUUUCUCCACGUCUUU   | GTCGGATTCTAATTTCTCCAC  | GTGCAGGGTCCGAGGTCAGAGCCACCTGGGCAATTTTTTTTTTAAAGAC  | 55 |
| >hsa-miR-1910-5p MIMAT0007884 | CCAGUCCUGUGCCUGCCGCCU    | TGGCCAGTCTGTGCCTG      | GTGCAGGGTCCGAGGTCAGAGCCACCTGGGCAATTTTTTTTTTAGGCCG  | 55 |

|                                |                          |                         |                                                    |    |
|--------------------------------|--------------------------|-------------------------|----------------------------------------------------|----|
| >hsa-miR-542-5p MIMAT0003340   | UCGGGGAUCAUCAUGUCACGAGA  | GGTCGGGGATCATCATGTC     | GTGCAGGGTCCGAGGTCAGAGCCACCTGGGCAATTTTTTTTTTCTCGTG  | 55 |
| >hsa-miR-454-3p MIMAT0003885   | UAGUGCAAUAUUGCUUAUAGGGU  | TTCGGTAGTGCAATATTGCTTA  | GTGCAGGGTCCGAGGTCAGAGCCACCTGGGCAATTTTTTTTTTACCCTA  | 55 |
| >hsa-miR-218-5p MIMAT0000275   | UUGUGCUUGAUCUAACCAUGU    | TGTCGGTTTGCTTGATCTAA    | GTGCAGGGTCCGAGGTCAGAGCCACCTGGGCAATTTTTTTTTTACATGG  | 55 |
| >hsa-miR-671-5p MIMAT0003880   | AGGAAGCCCUUGGAGGGGUGGAG  | TAGGAAGCCCTGGAGGGG      | GTGCAGGGTCCGAGGTCAGAGCCACCTGGGCAATTTTTTTTTTCTCCAG  | 55 |
| >hsa-miR-2276-3p MIMAT0011775  | UCUGCAAGUGUCAGAGGCGAGG   | CGGCTGCAAGTGTGACAGAG    | GTGCAGGGTCCGAGGTCAGAGCCACCTGGGCAATTTTTTTTTTCTCCAG  | 56 |
| >hsa-miR-758-5p MIMAT0022929   | GAUGGUUGACCAGAGAGCACAC   | CGGGATGGTTGACCAGAGA     | GTGCAGGGTCCGAGGTCAGAGCCACCTGGGCAATTTTTTTTTTGTGTGC  | 56 |
| >hsa-miR-373-3p MIMAT0000726   | GAAGUGCUUCGAUUUUGGGGUGU  | CGGGAAGTGCTTCGATTTTG    | GTGCAGGGTCCGAGGTCAGAGCCACCTGGGCAATTTTTTTTTTACACCC  | 56 |
| >hsa-miR-21-5p MIMAT0000076    | UAGCUUAUCAGACUGAUGUUGA   | TTCGGTAGCTTATCAGACTGA   | GTGCAGGGTCCGAGGTCAGAGCCACCTGGGCAATTTTTTTTTTCAACAT  | 56 |
| >hsa-miR-4689 MIMAT0019778     | UUGAGGAGACAUGGUGGGGGCC   | CGGTTGAGGAGACATGGTG     | GTGCAGGGTCCGAGGTCAGAGCCACCTGGGCAATTTTTTTTTTGGCCCC  | 56 |
| >hsa-miR-106b-5p MIMAT0000680  | UAAAGUGCUGACAGUGCAGAU    | GTCGGTAAAGTGCTGACAGT    | GTGCAGGGTCCGAGGTCAGAGCCACCTGGGCAATTTTTTTTTTATCTGC  | 56 |
| >hsa-miR-149-5p MIMAT0000450   | UCUGGCUCCGUGUCUUCACUCCC  | TGTCCTGGCTCCGTGTCTTC    | GTGCAGGGTCCGAGGTCAGAGCCACCTGGGCAATTTTTTTTTTGGGAGT  | 56 |
| >hsa-let-7b-5p MIMAT0000063    | UGAGGUAGUAGGUUGUGUGGUU   | TCGGTGAGGTAGTAGGTTGT    | GTGCAGGGTCCGAGGTCAGAGCCACCTGGGCAATTTTTTTTTTAACCAC  | 57 |
| >hsa-miR-4692 MIMAT0019783     | UCAGGCAGUGUGGUUAUCAGAU   | TGGTCAGGCAGTGTGGGTA     | GTGCAGGGTCCGAGGTCAGAGCCACCTGGGCAATTTTTTTTTTATCTGA  | 57 |
| >hsa-let-7d-3p MIMAT0004484    | CUAUAACGACCUGCUGCCUUUCU  | TGGCTATACGACCTGTCTGC    | GTGCAGGGTCCGAGGTCAGAGCCACCTGGGCAATTTTTTTTTTAGAAAAG | 57 |
| >hsa-miR-877-5p MIMAT0004949   | GUAGAGGAGAUGGCGCAGGG     | TTCGGGTAGAGGAGATGGC     | GTGCAGGGTCCGAGGTCAGAGCCACCTGGGCAATTTTTTTTTTCCCTGC  | 57 |
| >hsa-miR-15a-5p MIMAT0000068   | UAGCAGCACAUAAUGGUUUGUG   | TCGGTAGCAGCACATAATGG    | GTGCAGGGTCCGAGGTCAGAGCCACCTGGGCAATTTTTTTTTTACAAA   | 57 |
| >hsa-miR-105-5p MIMAT0000102   | UCAAUUGCUCAGACUCCUGUGGU  | TGGTCAAATGCTCAGACTCC    | GTGCAGGGTCCGAGGTCAGAGCCACCTGGGCAATTTTTTTTTTACCACA  | 57 |
| >hsa-miR-3646 MIMAT0018065     | AAAUAUGAAAUGAGCCCAGCCCA  | TTCGGAATGAAATGAGCCC     | GTGCAGGGTCCGAGGTCAGAGCCACCTGGGCAATTTTTTTTTTGGGCTG  | 57 |
| >hsa-miR-181d-5p MIMAT0002821  | AACAUAUCAUUGUUGUCGGUGGGU | TCGGAACATTCATTGTTGTCG   | GTGCAGGGTCCGAGGTCAGAGCCACCTGGGCAATTTTTTTTTTACCAC   | 58 |
| >hsa-miR-34b-3p MIMAT0004676   | CAAUCACUAACUCCACUGCCA    | TCGGCAATCACTAACTCCAC    | GTGCAGGGTCCGAGGTCAGAGCCACCTGGGCAATTTTTTTTTTATGGCA  | 58 |
| >hsa-miR-455-5p MIMAT0003150   | UAUGUGCCUUUGGACUACAUCG   | TCGGTATGTGCTTTGGACT     | GTGCAGGGTCCGAGGTCAGAGCCACCTGGGCAATTTTTTTTTTCGATGT  | 58 |
| >hsa-miR-378a-5p MIMAT0000731  | CUCCUGACUCCAGGUCCUGUGU   | GGCTCCTGACTCCAGTC       | GTGCAGGGTCCGAGGTCAGAGCCACCTGGGCAATTTTTTTTTTACACAG  | 58 |
| >hsa-miR-196a-5p MIMAT0000226  | UAGGUAGUUAUCAUGUUGUUGG   | GTCGGTAGGTAGTTTCATGTT   | GTGCAGGGTCCGAGGTCAGAGCCACCTGGGCAATTTTTTTTTTCCCAAC  | 58 |
| >hsa-miR-127-3p MIMAT0000446   | UCGGAUCCGUCAGAGCUUGGCU   | GGTCGGATCCGCTGAGC       | GTGCAGGGTCCGAGGTCAGAGCCACCTGGGCAATTTTTTTTTTAGCCAA  | 58 |
| >hsa-miR-590-5p MIMAT0003258   | GAGCUUAUUCAUAAAAGUGCAG   | TGTCGGGAGCTTATTCATAAAA  | GTGCAGGGTCCGAGGTCAGAGCCACCTGGGCAATTTTTTTTTTCTGCAC  | 58 |
| >hsa-miR-320d MIMAT0006764     | AAAAGCUGGGUUGAGAGGA      | GGTCGGAAAAGCTGGGTTG     | GTGCAGGGTCCGAGGTCAGAGCCACCTGGGCAATTTTTTTTTTCTCTCTC | 59 |
| >hsa-miR-140-3p MIMAT0004597   | UACCACAGGGUAGAACCACGG    | TTCGGTACCACAGGGTAGAA    | GTGCAGGGTCCGAGGTCAGAGCCACCTGGGCAATTTTTTTTTTCCGTGG  | 59 |
| >hsa-miR-769-5p MIMAT0003886   | UGAGACCUCUGGGUUCUGAGCU   | TGGTGAGACCTCTGGGTTC     | GTGCAGGGTCCGAGGTCAGAGCCACCTGGGCAATTTTTTTTTTGTCTCA  | 59 |
| >hsa-miR-330-5p MIMAT0004693   | UCUCUGGGCCUGUGUCUUAGGC   | GGTCTCTGGGCTGTGTC       | GTGCAGGGTCCGAGGTCAGAGCCACCTGGGCAATTTTTTTTTTGCCTAA  | 59 |
| >hsa-miR-1909-5p MIMAT0007882  | UGAGUGCCGGUGCCUGCCCUG    | TGGTGAGTGCCGGTGCCT      | GTGCAGGGTCCGAGGTCAGAGCCACCTGGGCAATTTTTTTTTTTCAGGGC | 59 |
| >hsa-miR-548c-3p MIMAT0003285  | CAAAAAUCUCAUUACUUUUGC    | TGTCGGCAAAAAATCTCAATTAC | GTGCAGGGTCCGAGGTCAGAGCCACCTGGGCAATTTTTTTTTTGCAAA   | 59 |
| >hsa-miR-1193 MIMAT0015049     | GGGAUGGUAGACCGGUGACGUGC  | GGGGATGGTAGACCGGTG      | GTGCAGGGTCCGAGGTCAGAGCCACCTGGGCAATTTTTTTTTTGCACGT  | 59 |
| >hsa-miR-214-5p MIMAT0004564   | UGCCUGUCUACACUUGCUGUGC   | CGGTGCCTGTCTACACTTG     | GTGCAGGGTCCGAGGTCAGAGCCACCTGGGCAATTTTTTTTTTGCACAG  | 60 |
| >hsa-miR-208a-3p MIMAT0000241  | AUAAGACGAGCAAAAAGCUUGU   | GTCGGATAAGACGAGCAAAAA   | GTGCAGGGTCCGAGGTCAGAGCCACCTGGGCAATTTTTTTTTTACAAGC  | 60 |
| >hsa-miR-29c-3p MIMAT0000681   | UAGCACCAUUUGAAAUCGGUUA   | GTCGGTAGCACCATTGAAAT    | GTGCAGGGTCCGAGGTCAGAGCCACCTGGGCAATTTTTTTTTTAAACCGA | 60 |
| >hsa-miR-624-5p MIMAT0003293   | UAGUACCAGUACCUUGUGUUA    | TCGGTAGTACCAGTACCTTG    | GTGCAGGGTCCGAGGTCAGAGCCACCTGGGCAATTTTTTTTTTGAACAC  | 60 |
| >hsa-miR-660-5p MIMAT0003338   | UACCCAUUGCAUAUCGGAGUUG   | TCGGTACCCATTGCATATCG    | GTGCAGGGTCCGAGGTCAGAGCCACCTGGGCAATTTTTTTTTTCAACTC  | 60 |
| >hsa-miR-30a-3p MIMAT0000088   | CUUUCAGUCGGAUGUUUGCAGC   | TCGGCTTTCAGTCGGATGTT    | GTGCAGGGTCCGAGGTCAGAGCCACCTGGGCAATTTTTTTTTTGTGCA   | 60 |
| >hsa-miR-26b-3p MIMAT0004500   | CCUGUUCUCCAUAUCUUGGCUC   | TCGGCCTGTCTCCATTACT     | GTGCAGGGTCCGAGGTCAGAGCCACCTGGGCAATTTTTTTTTTGGATCC  | 61 |
| >hsa-miR-331-5p MIMAT0004700   | CUAGGUAUGGUCCCAGGGAUCC   | TGGCTAGGTATGGTCCCAG     | GTGCAGGGTCCGAGGTCAGAGCCACCTGGGCAATTTTTTTTTTTCATGTA | 61 |
| >hsa-miR-3651 MIMAT0018071     | CAUAGCCCUGUCGUGGUAUCAUGA | CATAGCCCUGTCTGCTGGT     | GTGCAGGGTCCGAGGTCAGAGCCACCTGGGCAATTTTTTTTTTAAATAGG | 61 |
| >hsa-miR-154-3p MIMAT0000453   | AAUCAUACACGGUUGACCUAUU   | TTCGGAATCATACCGTTGA     | GTGCAGGGTCCGAGGTCAGAGCCACCTGGGCAATTTTTTTTTTTCGCGGT | 61 |
| >hsa-miR-218-2-3p MIMAT0004566 | CAUGGUUCUGUCAAGCACCGCG   | CGGCATGGTTCTGTCAAGC     |                                                    |    |

|                                |                         |                        |                                                    |    |
|--------------------------------|-------------------------|------------------------|----------------------------------------------------|----|
| >hsa-miR-125b-5p MIMAT0000423  | UCCUCGAGACCCUAACUUGUGA  | TGGTCCCTGAGACCCTAAC    | GTGCAGGGTCCGAGGTCAGAGCCACCTGGGCAATTTTTTTTTTTCACAAG | 61 |
| >hsa-miR-1206 MIMAT0005870     | UGUUCAUGUAGAUGUUUAAGC   | TGTCGGTGTTCATGTAGATGT  | GTGCAGGGTCCGAGGTCAGAGCCACCTGGGCAATTTTTTTTTTGTCTAA  | 61 |
| >hsa-miR-504-5p MIMAT0002875   | AGACCCUGGUCGACUCUAUC    | GGAGACCCTGGTCTGCAC     | GTGCAGGGTCCGAGGTCAGAGCCACCTGGGCAATTTTTTTTTTGATAGA  | 61 |
| >hsa-miR-1307-3p MIMAT0005951  | ACUCGGCGUGGCGUCGUGCGUG  | GACTCGGCGTGGCGTGC      | GTGCAGGGTCCGAGGTCAGAGCCACCTGGGCAATTTTTTTTTTTCACGAC | 62 |
| >hsa-miR-302b-3p MIMAT0000715  | UAAGUGCUUCCAUGUUUAGUAG  | TCGGTAAGTGTCTCCATGTTT  | GTGCAGGGTCCGAGGTCAGAGCCACCTGGGCAATTTTTTTTTTCTACTA  | 62 |
| >hsa-miR-221-3p MIMAT0000278   | AGCUACAUUGUCUGCGGUUUC   | TGGAGCTACATTGTCTGCTG   | GTGCAGGGTCCGAGGTCAGAGCCACCTGGGCAATTTTTTTTTTGAAACC  | 62 |
| >hsa-let-7f-5p MIMAT0000067    | UGAGGUAGUAGAUUGUAUAGUU  | TTCGGTGAGGTAGTAGATTGT  | GTGCAGGGTCCGAGGTCAGAGCCACCTGGGCAATTTTTTTTTTAACTAT  | 62 |
| >hsa-miR-216a-5p MIMAT0000273  | UAAUCUCAGCUGGCAACUGUGA  | TCGGTAATCTCAGCTGGCAA   | GTGCAGGGTCCGAGGTCAGAGCCACCTGGGCAATTTTTTTTTTTCACAGT | 62 |
| >hsa-miR-371b-3p MIMAT0019893  | AAGUGCCCCACAGUUUGAGUGC  | GGAAAGTGCCCCACAGTTT    | GTGCAGGGTCCGAGGTCAGAGCCACCTGGGCAATTTTTTTTTTGTCACTC | 62 |
| >hsa-miR-142-3p MIMAT0000434   | UGUAGUGUUUCCUACUUUAUGGA | TCGGTGTAGTGTTCCTACTT   | GTGCAGGGTCCGAGGTCAGAGCCACCTGGGCAATTTTTTTTTTCCATAA  | 62 |
| >hsa-miR-424-5p MIMAT0001341   | CAGCAGCAAUUCAGUUUUGAA   | TCGGCAGCAGCAATTCATGT   | GTGCAGGGTCCGAGGTCAGAGCCACCTGGGCAATTTTTTTTTTCAA AAC | 63 |
| >hsa-miR-1181 MIMAT0005826     | CCGUCGCCGCCACCCGAGCCG   | GCCGTCGCCGCCACCC       | GTGCAGGGTCCGAGGTCAGAGCCACCTGGGCAATTTTTTTTTTTCGGCTC | 63 |
| >hsa-miR-661 MIMAT0003324      | UGCCUGGGUCUCUGGCCUGCGCU | TGCCTGGGTCTCTGGCCT     | GTGCAGGGTCCGAGGTCAGAGCCACCTGGGCAATTTTTTTTTTTACGCGC | 63 |
| >hsa-miR-363-3p MIMAT0000707   | AAUUGCACGGUAUCCAUCUGUA  | TCGGAATTGCACGGTATCCA   | GTGCAGGGTCCGAGGTCAGAGCCACCTGGGCAATTTTTTTTTTTACAGAT | 63 |
| >hsa-miR-30c-1-3p MIMAT0004674 | CUGGGAGAGGGUUGUUACUCC   | TGGCTGGGAGAGGGTTGTT    | GTGCAGGGTCCGAGGTCAGAGCCACCTGGGCAATTTTTTTTTTTGGAGTA | 63 |
| >hsa-miR-93-3p MIMAT0004509    | ACUGCUGAGCUAGCACUCCCCG  | TGGACTGCTGAGCTAGCAC    | GTGCAGGGTCCGAGGTCAGAGCCACCTGGGCAATTTTTTTTTTTCGGGAA | 63 |
| >hsa-miR-193a-5p MIMAT0004614  | UGGGUCUUUGCGGGCGAGAUGA  | TGTGGGTCTTTGCGGGCG     | GTGCAGGGTCCGAGGTCAGAGCCACCTGGGCAATTTTTTTTTTTCATCTC | 63 |
| >hsa-miR-130b-5p MIMAT0004680  | ACUCUUUCCUGUUGCACUAC    | TTCGGACTCTTCCCTGTTG    | GTGCAGGGTCCGAGGTCAGAGCCACCTGGGCAATTTTTTTTTTTGTAGTG | 64 |
| >hsa-miR-3960 MIMAT0019337     | GGCGGCGGCGGAGGCGGGGG    | TGGGCGGCGGCGGAGG       | GTGCAGGGTCCGAGGTCAGAGCCACCTGGGCAATTTTTTTTTTCCCCCG  | 64 |
| >hsa-miR-1915-3p MIMAT0007892  | CCCCAGGGCGACGCGGCGGG    | GGCCCCAGGGCGACGC       | GTGCAGGGTCCGAGGTCAGAGCCACCTGGGCAATTTTTTTTTTCCCGCC  | 64 |
| >hsa-miR-371a-5p MIMAT0004687  | ACUCAAAUCUGUGGGGGCACU   | GTCGGACTCAAAGTGTGGG    | GTGCAGGGTCCGAGGTCAGAGCCACCTGGGCAATTTTTTTTTTAGTGCC  | 64 |
| >hsa-miR-328-3p MIMAT0000752   | CUGGCCUCUCUGCCCUUCCGU   | GCTGGCCCTCTTGCCC       | GTGCAGGGTCCGAGGTCAGAGCCACCTGGGCAATTTTTTTTTTACGGAA  | 64 |
| >hsa-miR-30d-5p MIMAT0000245   | UGUAAAACUCCCCGACUGGAAG  | CGGTGTAACATCCCGAC      | GTGCAGGGTCCGAGGTCAGAGCCACCTGGGCAATTTTTTTTTTCTCCA   | 64 |
| >hsa-miR-212-3p MIMAT0000269   | UAACAGUCUCCAGUCACGGCC   | TTCGGTAACAGTCTCCAGTC   | GTGCAGGGTCCGAGGTCAGAGCCACCTGGGCAATTTTTTTTTTTGGCCGT | 64 |
| >hsa-miR-1913 MIMAT0007888     | UCUGCCCCUCGCGUCGCCA     | TCTGCCCCCTCCGCTG       | GTGCAGGGTCCGAGGTCAGAGCCACCTGGGCAATTTTTTTTTTTGGCAGC | 65 |
| >hsa-miR-1587 MIMAT0019077     | UUGGUCUGGGCUGGGUUGGG    | CGGTTGGGCTGGGCTGG      | GTGCAGGGTCCGAGGTCAGAGCCACCTGGGCAATTTTTTTTTTCCCAAC  | 65 |
| >hsa-miR-548c-5p MIMAT0004806  | AAAAGUAAUUGCGGUUUUUGCC  | GTGCGAAAAGTAATTGCGGTT  | GTGCAGGGTCCGAGGTCAGAGCCACCTGGGCAATTTTTTTTTTTGGCAA  | 65 |
| >hsa-miR-1233-3p MIMAT0005588  | UGAGCCUGUCCUCCCGCAG     | TCGGTGAGCCCTGTCTC      | GTGCAGGGTCCGAGGTCAGAGCCACCTGGGCAATTTTTTTTTTCTGCGG  | 65 |
| >hsa-miR-4688 MIMAT0019777     | UAGGGGCAGCAGAGGACCUGGG  | GGTAGGGGCAGCAGAGGA     | GTGCAGGGTCCGAGGTCAGAGCCACCTGGGCAATTTTTTTTTTCCCAGG  | 65 |
| >hsa-miR-200a-5p MIMAT0001620  | CAUCUUACCGACAGUGCUGGA   | CGGCATCTTACCGACAGT     | GTGCAGGGTCCGAGGTCAGAGCCACCTGGGCAATTTTTTTTTTCCAGCA  | 65 |
| >hsa-miR-629-3p MIMAT0003298   | GUUCUCCCAACGUAAGCCAGC   | CGGGTCTCCCAACGTAAG     | GTGCAGGGTCCGAGGTCAGAGCCACCTGGGCAATTTTTTTTTTGTGTTG  | 65 |
| >hsa-miR-378e MIMAT0018927     | ACUGGACUUGGAGUCAGGA     | TGTCGGACTGGACTTGGAG    | GTGCAGGGTCCGAGGTCAGAGCCACCTGGGCAATTTTTTTTTTCTTGAC  | 66 |
| >hsa-miR-187-3p MIMAT0000262   | UCGUGUCUUGUGUUGCAGCCGG  | CGGTCTGTCTTGTGTTGC     | GTGCAGGGTCCGAGGTCAGAGCCACCTGGGCAATTTTTTTTTTCCGGCT  | 66 |
| >hsa-miR-4289 MIMAT0016920     | GCAUUGUGCAGGGCUAUCA     | GTCGGGCATTGTGCAGGG     | GTGCAGGGTCCGAGGTCAGAGCCACCTGGGCAATTTTTTTTTTTGATAGC | 66 |
| >hsa-miR-500a-5p MIMAT0004773  | UAAUCCUUGCUACCUGGGUGAGA | TGGTAATCCTTGCTACCTGG   | GTGCAGGGTCCGAGGTCAGAGCCACCTGGGCAATTTTTTTTTTCTCACC  | 66 |
| >hsa-miR-24-3p MIMAT0000080    | UGGCUCAGUUCAGCAGGAACAG  | TGGTGGCTCAGTTCAGCAG    | GTGCAGGGTCCGAGGTCAGAGCCACCTGGGCAATTTTTTTTTTCTGTTT  | 66 |
| >hsa-miR-32-5p MIMAT0000090    | UAUUGCACAUUACUAAGUUGCA  | TGTCGGTATTGCACATTACTAA | GTGCAGGGTCCGAGGTCAGAGCCACCTGGGCAATTTTTTTTTTTGCAACT | 66 |
| >hsa-let-7d-5p MIMAT0000065    | AGAGGUAGUAGGUUGCAUAGUU  | CGGAGAGGTAGTAGGTTGC    | GTGCAGGGTCCGAGGTCAGAGCCACCTGGGCAATTTTTTTTTTAACTAT  | 66 |
| >hsa-miR-4786-5p MIMAT0019954  | UGAGACCAGGACUGGAUGCACC  | TGGTGAGACCAGGACTGGA    | GTGCAGGGTCCGAGGTCAGAGCCACCTGGGCAATTTTTTTTTTTGGTGCA | 67 |
| >hsa-miR-1207-5p MIMAT0005871  | UGGCAGGGAGGCUGGGAGGGG   | GGTGGCAGGGAGGCTGG      | GTGCAGGGTCCGAGGTCAGAGCCACCTGGGCAATTTTTTTTTTCCCTC   | 67 |
| >hsa-miR-29b-3p MIMAT0000100   | UAGCACCAUUUGAAAUCAGUGUU | TCGGTAGCACCATTTGAAATC  | GTGCAGGGTCCGAGGTCAGAGCCACCTGGGCAATTTTTTTTTTAACT    | 67 |
| >hsa-miR-4306 MIMAT0016858     | UGGAGAGAAAGGCAGUA       | TCGGTCCGTGGAGAGAAAG    | GTGCAGGGTCCGAGGTCAGAGCCACCTGGGCAATTTTTTTTTTACTGCC  | 67 |
| >hsa-miR-301b-3p MIMAT0004958  | CAGUGCAAUGAUUUGUCAAAGC  | TCGGCAGTGCAATGATATTGT  | GTGCAGGGTCCGAGGTCAGAGCCACCTGGGCAATTTTTTTTTTTGCTTGG | 67 |

|                                |                                          |                       |                                                    |    |
|--------------------------------|------------------------------------------|-----------------------|----------------------------------------------------|----|
| >hsa-miR-3185 MIMAT0015065     | AGAAGAAGGCGGUCGGUCUGCGG                  | TGAGAAGAAGGCGGTCGGT   | GTGCAGGGTCCGAGGTCAGAGCCACCTGGGCAATTTTTTTTTTCCGCAG  | 67 |
| >hsa-miR-136-3p MIMAT0004606   | CAUCAUCGUCUCAAUGAGUCU                    | TTCGGCATCATCGTCTCAAAT | GTGCAGGGTCCGAGGTCAGAGCCACCTGGGCAATTTTTTTTTTAGACTC  | 67 |
| >hsa-miR-495-3p MIMAT0002817   | AAACAAACAUGGUGCACUUCUU                   | TTCGGAAACAACATGGTGCA  | GTGCAGGGTCCGAGGTCAGAGCCACCTGGGCAATTTTTTTTTTAAGAAG  | 68 |
| >hsa-miR-34b-5p MIMAT0000685   | UAGGCAGUGUCAUUAGCUGAUUG                  | TGGTAGGCAGTGTATTAGC   | GTGCAGGGTCCGAGGTCAGAGCCACCTGGGCAATTTTTTTTTCAATCA   | 68 |
| >hsa-miR-92a-1-5p MIMAT0004507 | AGGUUGGGAUCGGUUGCAAUGCU                  | TGAGGTTGGGATCGGTTGC   | GTGCAGGGTCCGAGGTCAGAGCCACCTGGGCAATTTTTTTTTAGCATT   | 68 |
| >hsa-miR-4302 MIMAT0016855     | CCAGUGUGGCUCAGCGAG                       | TGTCGGCCAGTGTGGCTC    | GTGCAGGGTCCGAGGTCAGAGCCACCTGGGCAATTTTTTTTTCTCGCT   | 68 |
| >hsa-miR-4291 MIMAT0016922     | UUCAGCAGGAACAGCU                         | TTCGGTCGGTTCAGCAGGA   | GTGCAGGGTCCGAGGTCAGAGCCACCTGGGCAATTTTTTTTTTAGCTGT  | 68 |
| >hsa-miR-486-5p MIMAT0002177   | UCCUGUACUGAGCUGCCCCGAG                   | TGGTCCTGTACTGAGCTGC   | GTGCAGGGTCCGAGGTCAGAGCCACCTGGGCAATTTTTTTTTCTCGGG   | 68 |
| >hsa-miR-28-5p MIMAT0000085    | AAGGAGCUCACAGUCUUAUUGAG                  | CGGAAGGAGCTCACAGTCT   | GTGCAGGGTCCGAGGTCAGAGCCACCTGGGCAATTTTTTTTTTCTCAAT  | 68 |
| >hsa-miR-423-3p MIMAT0001340   | AGCUCGGUCUGAGGCCCCUCAGU                  | TAGCTCGGTCTGAGGCC     | GTGCAGGGTCCGAGGTCAGAGCCACCTGGGCAATTTTTTTTTTACTGAG  | 69 |
| >hsa-let-7a-5p MIMAT0000062    | UGAGGUAGUAGGUUGUAUAGUU                   | TCGGTGAGGTAGTAGGTTGT  | GTGCAGGGTCCGAGGTCAGAGCCACCTGGGCAATTTTTTTTTTAACTAT  | 69 |
| >hsa-miR-514a-3p MIMAT0002883  | AUUGACACUUCUGUGAGUAGA                    | GTCGGATTGACACTTCTGTG  | GTGCAGGGTCCGAGGTCAGAGCCACCTGGGCAATTTTTTTTTTCTACTC  | 69 |
| >hsa-miR-370-3p MIMAT0000722   | GCCUGCUGGGUGGAACCUUGU                    | TGGCCTGCTGGGGTGGAA    | GTGCAGGGTCCGAGGTCAGAGCCACCTGGGCAATTTTTTTTTTACCAGG  | 69 |
| >hsa-miR-132-3p MIMAT0000426   | UACAGUCUACAGCCAUGGUCG                    | TCGGTAACAGTCTACAGCCA  | GTGCAGGGTCCGAGGTCAGAGCCACCTGGGCAATTTTTTTTTTCGACCA  | 69 |
| >hsa-miR-21-3p MIMAT0004494    | CAACACCAGUCGAUUGGGUCUG                   | TCGGCAACACCAGTCGATG   | GTGCAGGGTCCGAGGTCAGAGCCACCTGGGCAATTTTTTTTTTACAGCC  | 69 |
| >hsa-miR-154-5p MIMAT0000452   | UAGGUUAUCCGUGUUGCCUUCG                   | TCGGTAGGTTATCCGTGTG   | GTGCAGGGTCCGAGGTCAGAGCCACCTGGGCAATTTTTTTTTTCGAAGG  | 69 |
| >hsa-miR-346 MIMAT0000773      | UGUCUGCCCGCAUGCCUGCCUCU                  | GTGTCTGCCCGCATGCCT    | GTGCAGGGTCCGAGGTCAGAGCCACCTGGGCAATTTTTTTTTTAGAGGC  | 70 |
| >hsa-miR-103a-3p MIMAT0000101  | AGCAGCAUUGUACAGGGCUAUGA                  | GGAGCAGCATTGTACAGGG   | GTGCAGGGTCCGAGGTCAGAGCCACCTGGGCAATTTTTTTTTTTCATAGC | 70 |
| >cel-miR-54-5p MIMAT0020773    | AGGAUAUGAGACGACGAGAACA                   | TCGGAGGATATGAGACGACG  | GTGCAGGGTCCGAGGTCAGAGCCACCTGGGCAATTTTTTTTTTGTCTC   |    |
| Universal reverse primer       | CAGTGCAGGGTCCGAGGT                       |                       |                                                    |    |
| Universal Taqman probe         | 56-FAM/CAGAGCCAC/ZEN/CTGGGCAATTT/3IABkFQ |                       |                                                    |    |
